# Supplementary material for: Impacts of vaping and marijuana use on airway health as determined by exhaled breath condensate (EBC)
Source: Respir Res. 2025 Feb 21;26:63. doi: 10.1186/s12931-025-03147-3 (PMC11846476; doi:10.1186/s12931-025-03147-3)
Supplement: Supplementary file 2 — Additional file 2. [file 12931_2025_3147_MOESM2_ESM.xlsx]

## Sheet: Header
Column	Meaning
#	Sort
Score	MS spectral match against library
Mass	Theoretical mass
Formula	Putative chemical formula
Systematic Name	Putative chemical name
Superclass	Putative superclass
Class	Putative class
Subclass	Putative subclass
VIP >1	VIP Score from PLS-DA model, user group against non-users
p-value	p-value, user group compared to non-user
FC	Fold change, ratio mean user group to mean non-user

## Sheet: Data
								1) Tobacco smokers			2) E-cigarettes vapers			3) Nicotine product users			4) Marijuana smokers			5) THC/CBD vapers			6) Cannabis product users			7) Combustion users			8) Edevice/vape users
#	Score	Mass	Formula	Systematic Name	Superclass	Class	Subclass	VIP >1	p-value	FC	VIP >1	p-value	FC	VIP >1	p-value	FC	VIP >1	p-value	FC	VIP >1	p-value	FC	VIP >1	p-value	FC	VIP >1	p<0.05	|FC|>2	VIP >1	p-value	FC
3	99.84	85.1	C5H11N	piperidine	Organo heterocyclic compounds	Piperidines		-	-	-	1.09535	2.14099e-05	5.64247	1.01534	3.14488e-06	11.357	1.59764	1.19349e-06	13.4913	1.72237	3.57799e-06	15.2644	1.73031	1.27099e-07	11.357	1.24798	3.46561e-05	7.08446	1.55785	1.45747e-05	8.64728
5	79.6	99.1	C14H22ClN3O2	4-amino-5-chloro-N-[2-(diethylamino)ethyl]-2-methoxybenzamide	Benzenoids	Benzenes	Benzoic acids	1.14789	0.000128322	6.20281	-	-	-	-	-	-	-	-	-	-	-	-	-	-	-	-	-	-	-	-	-
10	94.71	370.2	C17H32N4O6	(2S)-6-amino-2-[[(2S)-2-[[(2S)-2-amino-4-carboxybutanoyl]amino]-4-methylpentanoyl]amino]hexanoic acid	Organic nitrogen compounds	Alkaloids and derivatives	Ergoline and derivatives	1.34502	1.32215e-05	-13.4285	1.4607	4.71345e-06	-15.0907	1.23348	4.0875e-05	-9.22553	1.11654	1.25155e-05	-9.37818	-	-	-	1.47479	1.42703e-06	-9.22553	1.04599	5.83326e-05	7.40931	1.22493	3.68243e-05	-8.91
15	91.17	364.1	C26H52NO8P	1-(1Z-eicosenyl)-glycero-3-phosphoserine	Lipids and lipid-like molecules	Glycerolipids	1Z-alkenylglycerophosphoserines	-	-	-	-	-	-	-	-	-	1.38016	1.51372e-06	-19.743	1.15307	4.71245e-05	-8.51874	1.25006	1.83363e-06	-8.52367	1.10158	4.48907e-05	8.44213	1.01691	0.000117846	-5.70436
17	98.22	414.2	C16H35NO2	hexadecasphinganine	Lipids and lipid-like molecules	Sphingoid bases	Sphingoid base analogs	1.10171	4.08679e-05	-3.57664	1.01017	1.55061e-05	-3.91979	-	-	-	-	-	-	-	-	-	1.13833	2.52931e-06	-4.12018	-	-	-	-	-	-
19	99.63	226.2	C12H24N2O3	2-[(2-amino-4-methylpentanoyl)amino]-4-methylpentanoic acid	Organic acids and derivatives	Carboxylic acids and derivatives	Amino acids, peptides, and analogues	1.32552	1.43891e-05	6.95521	-	-	-	1.07234	1.91142e-05	5.93545	1.41329	1.25792e-06	8.88146	1.27609	7.91669e-06	8.38304	1.43459	7.2151e-07	5.93545	1.40966	6.57426e-06	7.01402	1.00869	5.26738e-05	4.85486
20	88.14	364.1	C18H36N6O6	N-[(1R,2S,3R,4R,5S,6R)-4-amino-3-[(2R,3S,6S)-3-ami...	Organic oxygen compounds	Organooxygen compounds	Carbohydrates and carbohydrate conjugates	-	-	-	-	-	-	-	-	-	1.05428	1.55617e-05	-8.00235	1.18316	3.30318e-05	-8.93491	-	-	-	-	-	-	-	-	-
22	99.63	393.3	C15H29N3O4	L-Alanyl-L-leucyl-L-leucine	Organic acids and derivatives	Carboxylic acids and derivatives	Alcohols and polyols	-	-	-	-	-	-	-	-	-	1.39939	1.08715e-06	-22.3725	1.37267	8.25726e-06	-18.9334	1.24043	1.73283e-06	-9.0063	-	-	-	-	-	-
26	97.65	393.3	C24H42O4	(3R,5S,7R,8R,9S,10S,12S,13R,14S,17R)-17-[(2R)-5-hydroxypentan-2-yl]-10,13-dimethyl-2,3,4,5,6,7,8,9,11,12,14,15,16,17-tetradecahydro-1H-cyclopenta[a]phenanthrene-3,7,12-triol	Lipids and lipid-like molecules	Fatty Acids and Conjugates	N-acyl amino acids	-	-	-	-	-	-	-	-	-	1.22671	4.299e-06	-12.4833	1.19626	3.47986e-05	-9.45797	1.20026	1.88807e-06	-7.55187	-	-	-	-	-	-
34	70.26	458.3	C14H28N4O6	L-Threonyl-L-lysyl-L-threonine	Organic acids and derivatives	Amino Acids and Peptides	Tripeptides	1.37144	1.64781e-05	10.0311	-	-	-	-	-	-	-	-	-	-	-	-	-	-	-	-	-	-	-	-	-
35	88.69	86	C5H8S	5-methyl-2,3-dihydrothiophene	Organo heterocyclic compounds	Dihydrothiophenes	Dihydrothiophenes	-	-	-	1.08836	1.68171e-05	-8.23588	-	-	-	-	-	-	1.00875	9.19279e-05	-7.43621	-	-	-	-	-	-	1.06525	9.63443e-05	-6.87909
48	99.54	243.39						-	-	-	-	-	-	-	-	-	1.13472	1.32137e-05	-9.10298	-	-	-	-	-	-	-	-	-	-	-	-
50	98.89	337.3	C18H37NO3	6-hydroxysphing-4E-enine	Lipids and lipid-like molecules	Sphingoid Bases	Sphingoid Base Analogs	-	-	-	1.11248	1.13869e-05	-8.99324	1.01301	4.95532e-05	-8.48512	1.27429	2.3553e-06	-16.0183	1.16821	4.05203e-05	-9.03473	1.23127	1.6811e-06	-8.48512	1.20269	2.61964e-05	9.90419	1.0053	6.70619e-05	-6.9081
52	97.15	448.1	C10H16S2	1-(1Z-octadecenyl)-2-tridecanoyl-glycero-3-phosphoethanolamine	Lipids and lipid-like molecules	Glycerolipids	Ether Phosphatidylethanolamines	-	-	-	1.01549	8.5881e-06	-5.39373	-	-	-	-	-	-	-	-	-	-	-	-	-	-	-	-	-	-
53	<70	410.1						-	-	-	1.08973	1.08539e-05	-9.62019	1.26074	6.46951e-06	-15.5084	1.35562	7.97906e-07	-22.0806	1.26218	1.58145e-05	-12.3694	1.56659	2.45885e-07	-15.5084	1.23866	1.29136e-05	12.4252	1.0551	6.17439e-05	-7.13062
54	98.89	361.2						1.04445	0.000150383	-2.95992	1.19993	1.13343e-05	-6.54956	-	-	-	-	-	-	-	-	-	-	-	-	-	-	-	1.13911	0.000149137	-4.09298
63	71.56	687.5	C8H12ClN7O	3-amino-6-chloro-N-(diaminomethylidene)-5-(dimethylamino)pyrazine-2-carboxamide	Organo heterocyclic compounds	Diazines	Pyrazines	-	-	-	1.10555	1.69405e-05	-6.46165	-	-	-	1.31211	3.1998e-06	-12.9574	-	-	-	1.09882	6.20108e-06	-4.98112	1.00057	0.000113983	5.45433	-	-	-
66	99.21	314.2	C20H28O4	(Z)-7-[(1R,2S)-2-[(1E,3S,5Z)-3-hydroxyocta-1,5-dienyl]-5-oxocyclopent-3-en-1-yl]hept-5-enoic acid	Lipids and lipid-like molecules	Fatty Acids and Conjugates	Eicosanoids	-	-	-	1.00282	4.03301e-05	-4.45957	-	-	-	1.07933	2.40833e-05	-7.4284	1.18973	2.2987e-05	-11.3399	1.262	1.88803e-06	-8.1996	1.0615	6.92036e-05	6.98287	1.14982	6.08817e-05	-7.35511
67	87.33	731.5	C35H66O8	3-(2,8,13,14,17,18-hexahydroxytriacontyl)-5-methyl-2,5-dihydrofuran-2-one	Lipids and lipid-like molecules	Fatty Acids and Conjugates	Fatty alcohols	-	-	-	1.02785	2.39754e-05	-6.00951	-	-	-	1.13789	2.14082e-05	-7.58447	-	-	-	-	-	-	-	-	-	1.0442	0.000134511	-5.21243
68	99.88	156	C15H26O3	2,6,10,10-tetramethyl-1-oxaspiro[4.5]decan-6-yl acetate	Organo heterocyclic compounds	Oxolanes		-	-	-	1.09724	6.18474e-05	-4.23706	1.1492	0.000975328	-3.40266	-	-	-	1.05889	0.000454295	-3.85615	1.06314	3.17262e-05	-3.40266	-	-	-	1.19507	0.000453165	-3.79781
69	95.43	436.2	C28H76NO8P	(2-aminoethoxy)[(2R)-3-(octadecanoyloxy)-2-(pentadecanoyloxy)propoxy]phosphinic acid	Lipids and lipid-like molecules	Glycerolipids	Phosphatidylethanolamines	-	-	-	1.02385	1.14785e-05	-4.63509	1.39524	5.31731e-05	-4.50614	-	-	-	-	-	-	1.1429	1.7786e-06	-4.50614	1.07358	3.98151e-05	4.71456	1.00257	6.18743e-05	-3.89756
70	89	448.1	C39H65NO12	2-[[4,5-dihydroxy-2-(hydroxymethyl)-6-[5',7,9,13-tetramethyl-5-oxaspiro[pentacyclo[10.8.0.0²,⁹.0⁴,⁸.0¹³,¹⁸]icosane-6,2'-piperidine]oxy]oxan-3-yl]oxy]-6-(hydroxymethyl)oxane-3,4,5-triol	Lipids and lipid-like molecules	Steroids and steroid derivatives	Steroidal glycosides	-	-	-	1.27	3.76823e-06	-7.16599	1.08747	3.2382e-05	-4.58374	-	-	-	-	-	-	1.16657	1.14757e-06	-4.58374	-	-	-	1.18242	1.35341e-05	-5.554
72	99.21	486.1	C20H28O4	(9E)-11,16-dihydroxyoctadeca-9,17-dien-12,14-diyn-1-yl acetate	Lipids and lipid-like molecules	Fatty Acids and Conjugates	Fatty alcohols	-	-	-	-	-	-	1.01879	3.97631e-06	-16.5178	1.6218	1.47166e-07	-34.8554	1.49972	4.60177e-06	-20.7632	1.61854	1.61393e-07	-16.5178	1.39322	6.08584e-06	14.8811	1.12092	5.09699e-05	-8.10216
74	87.72	143.2	C6H6N4	6,7-dihydropteridine	Organo heterocyclic compounds	Pteridines		-	-	-	1.10484	2.61457e-05	-5.88984	-	-	-	-	-	-	-	-	-	-	-	-	-	-	-	1.03394	0.000173779	-4.7736
76	99.21	332.2						-	-	-	1.13856	9.01665e-06	-10.9641	1.13325	8.4424e-06	-14.1402	1.33067	9.07409e-07	-21.174	1.32916	1.30905e-05	-13.8355	1.46202	3.23434e-07	-14.1402	1.33274	1.53932e-05	11.6091	1.20133	2.69421e-05	-9.99034
78	99.12	400.44						-	-	-	-	-	-	-	-	-	1.1135	3.62189e-05	-6.18334	1.02156	9.37339e-05	-6.28647	-	-	-	-	-	-	1.22508	0.000123819	-5.38424
80	<70	222.1						-	-	-	-	-	-	1.17342	1.34864e-05	-12.6101	1.35509	2.30534e-06	-16.7273	1.16395	2.22618e-05	-11.5831	1.45728	5.02507e-07	-12.6101	1.13147	3.8885e-05	9.05996	0.998293	0.000115672	-5.86805
83	98.71	72.1	C18H26O3	8-hydroxy-17-octadecene-10,12-diynoic acid	Lipids and lipid-like molecules	Fatty Acids and Conjugates	Octadecanoids	1.11555	0.000212663	3.78888	-	-	-	-	-	-	-	-	-	-	-	-	-	-	-	-	-	-	-	-	-
85	95.67	486.1	C42H82NO9P	1-(1Z-hexadecenyl)-2-eicosanoyl-glycero-3-phosphoserine	Lipids and lipid-like molecules	Glycerolipids	Ether Phosphatidylserines	-	-	-	-	-	-	-	-	-	1.53695	3.95255e-07	-32.796	1.29999	1.77872e-05	-14.2533	1.34194	1.20015e-06	-10.6098	1.25516	1.39937e-05	13.8692	1.01508	0.000130536	-6.03622
86	92.1	334.3	C11H20N4O5S	Glycyl-L-methionyl-L-asparagine	Organic acids and derivatives	Amino acids and peptides	Tripeptides	-	-	-	1.08389	2.86127e-05	5.10576	-	-	-	-	-	-	-	-	-	-	-	-	-	-	-	-	-	-
88	85.06	163.9	As H3 O4	Arsenate	Mixed metal/non-metal compounds	Miscellaneous mixed metal/non-metals	Miscellaneous metallic oxoanionic compounds	1.62185	3.40862e-06	-19.5092	1.42906	7.46593e-06	-10.0796	1.47603	0.000293667	-4.1881	1.02778	3.3917e-05	-5.61018	-	-	-	-	-	-	1.38433	2.88142e-05	8.15553	1.27878	7.68802e-05	-5.67722
91	99.77	199.2	C12H24O2	pentyl heptanoate	Lipids and lipid-like molecules	Fatty Acids and Conjugates	Fatty acid esters	-	-	-	1.06379	1.2914e-05	-8.15134	-	-	-	1.26136	4.45349e-06	-11.7436	1.29114	1.75043e-05	-11.2871	1.34376	8.79336e-07	-9.4356	1.09921	3.92751e-05	7.7866	1.1846	2.92392e-05	-8.76404
95	99.94	474.3	C11H22O2	4-methyl-decanoic acid	Lipids and lipid-like molecules	Fatty Acids and Conjugates	Branched fatty acids	1.13833	7.90282e-05	7.48986	-	-	-	-	-	-	-	-	-	1.19412	0.000143217	7.74003	1.30942	1.05852e-05	6.11881	-	-	-	-	-	-
98	99.06	314.2	C12H24N6O5	L-Seryl-L-arginyl-L-alanine	Organic acids and derivatives	Amino acids and peptides	Tripeptides	1.26013	1.75664e-05	-10.2064	1.04679	1.66069e-05	-6.68607	1.12684	0.000133566	-5.78396	1.05653	7.39695e-06	-10.2006	-	-	-	1.06246	3.93779e-06	-5.78396	1.11808	4.95149e-05	7.16688	-	-	-
101	99.12	119.1	C18H15O4P	triphenyl phosphate	Organic acids and derivatives	Organic phosphonic acids and derivatives	Phosphate esters	1.2558	9.95333e-05	5.0051	1.04151	4.43236e-05	4.53399	-	-	-	-	-	-	-	-	-	-	-	-	-	-	-	-	-	-
104	93.26	486.1	C40H75NO8	N-[(4E,8E)-3-hydroxy-1-[[3,4,5-trihydroxy-6-(hydroxymethyl)oxan-2-yl]oxy]octadeca-4,8-dien-2-yl]hexadecanamide	Lipids and lipid-like molecules	Prenol lipids	Terpene glycosides	-	-	-	-	-	-	-	-	-	1.31661	4.0226e-06	-13.6086	1.38411	1.70142e-05	-12.7718	1.26161	2.23137e-06	-7.48279	1.22831	3.44639e-05	9.01133	1.06245	0.00020094	-4.68721
105	99.13	558.1	C17H34N10O5	L-Glutaminyl-L-arginyl-L-arginine	Organic acids and derivatives	Amino acids and peptides	Tripeptides	-	-	-	-	-	-	-	-	-	1.02901	3.38679e-05	-8.43026	1.04873	0.00011374	-7.68296	-	-	-	-	-	-	-	-	-
106	99.06	332.36						-	-	-	1.43876	1.61558e-05	7.40099	1.68237	0.0013194	2.58454	-	-	-	-	-	-	-	-	-	-	-	-	-	-	-
107	75.15	156.2						-	-	-	-	-	-	-	-	-	1.05388	2.07578e-05	-7.70261	1.3738	1.40113e-05	-13.0885	1.69517	1.18247e-06	-9.18525	1.07005	0.000138189	5.43986	1.22439	5.64141e-05	-7.39391
108	99.69	333.2	C16H30O7	2-[(E)-7-hydroxy-3,7-dimethyloct-5-enoxy]-6-(hydroxymethyl)oxane-3,4,5-triol	Lipids and lipid-like molecules	Fatty Acids and Conjugates	Fatty acyl glycosides	-	-	-	1.20433	4.73894e-06	-7.9584	-	-	-	1.31778	8.91479e-07	-11.6079	1.2221	7.6879e-06	-9.36596	1.3198	3.82966e-07	-8.38498	1.05355	2.90789e-05	6.04824	1.25892	1.03978e-05	-8.00053
109	<70	211.2						1.13306	5.57698e-05	-5.63556	-	-	-	1.08479	0.00160043	-2.273	-	-	-	-	-	-	-	-	-	-	-	-	-	-	-
113	<70	270.2						-	-	-	-	-	-	-	-	-	-	-	-	1.21103	2.94251e-05	-6.7827	-	-	-	-	-	-	-	-	-
115	99.64	1237.7	C9H17N	(2R,6R)-2-methyl-6-[(1E)-prop-1-en-1-yl]piperidine	Organic nitrogen compounds	Alkaloids and derivatives	Piperidine alkaloids	-	-	-	1.3104	1.80162e-05	-6.86411	1.26191	0.000258852	-4.78261	-	-	-	-	-	-	1.23033	7.50159e-06	-4.78261	-	-	-	-	-	-
117	<70	263.1						1.8386	2.06348e-06	-27.8102	1.54187	3.74225e-06	-17.1767	2.06544	2.03584e-08	-48.28	1.87541	1.20104e-07	-34.8879	1.50726	5.48348e-06	-17.7095	2.63326	8.42844e-10	-48.28	1.93171	2.64188e-07	28.6702	1.78781	1.75641e-06	-20.2609
118	87.38	647.4	C13H27NO2	2-amino-tridecanoic acid	Lipids and lipid-like molecules	Fatty Acids and Conjugates	Amino fatty acids	1.12644	4.7511e-05	-5.71516	-	-	-	0.995429	0.000689079	-3.09688	-	-	-	-	-	-	-	-	-	-	-	-	-	-	-
119	74.96	103.1	C25H34O4	17-Propylestra-1,3,5(10)-triene-3,17beta-diol diacetate	Lipids and lipid-like molecules	Steroids and steroid derivatives	Steroid esters	1.2307	3.47685e-05	8.99476	1.34907	1.19881e-05	10.0458	1.5079	0.00029568	5.18976	-	-	-	-	-	-	1.29244	8.63488e-06	5.18976	1.03467	0.000426257	4.02975	1.41062	0.000137864	5.71812
122	98.02	337.26						-	-	-	1.35607	5.54935e-06	-11.8542	1.13402	0.000154185	-5.38114	1.10919	1.14813e-05	-8.54712	1.08655	6.17986e-05	-6.94686	1.04305	4.54615e-06	-5.38114	1.12291	5.203e-05	6.71173	1.14477	3.52928e-05	-7.81916
123	97.79	414.2	C21H37O7P	PA(18:3(6Z,9Z,12Z)/0:0)	Lipids and lipid-like molecules	Glycerophospholipids	Glycerophosphates	-	-	-	-	-	-	-	-	-	1.00067	2.47184e-05	-6.65051	-	-	-	-	-	-	-	-	-	-	-	-
124	<70	489.3						1.02784	3.91205e-05	-7.13705	-	-	-	-	-	-	-	-	-	-	-	-	-	-	-	-	-	-	-	-	-
126	99.3	259.34	C13H25NO4					1.01908	9.31969e-05	-4.56183	1.29026	1.79182e-05	-6.68127	1.11867	7.74818e-05	-6.77959	1.08084	3.36819e-05	-6.12557	1.47134	1.4944e-05	-12.2689	1.48644	2.39661e-06	-6.77959	1.10221	0.000156	5.06731	1.34077	4.27543e-05	-7.79735
130	92.86	298.1	C32H60NO11P	[(8R,9S,13S,14S,17S)-17-acetyloxy-13-methyl-17-propyl-7,8,9,11,12,14,15,16-octahydro-6H-cyclopenta[a]phenanthren-3-yl] acetate	Lipids and lipid-like molecules	Glycerolipids		-	-	-	-	-	-	-	-	-	1.1252	9.42925e-06	-7.20538	1.2441	2.39211e-05	-7.73113	1.22378	1.80874e-06	-6.2249	-	-	-	1.09218	8.18822e-05	-4.913
134	<70	148						1.01586	4.57612e-05	-5.49262	0.995587	3.23605e-05	-4.19768	1.35369	0.000139214	-5.07559	-	-	-	-	-	-	1.17789	4.1004e-06	-5.07559	-	-	-	1.10504	0.000120446	-4.57709
140	78.41	915.6	C12H19N6OP	2-[bis(dimethylamino)phosphoryl]-5-phenyl-1,2,4-triazol-3-amine	Organo heterocyclic compounds	Azoles	Triazoles	-	-	-	0.996168	2.13262e-05	-4.94277	-	-	-	-	-	-	-	-	-	-	-	-	-	-	-	-	-	-
143	93.23	352.2	C13H20N4O3	1-[(5S)-5-hydroxyhexyl]-3,7-dimethylpurine-2,6-dione	Organo heterocyclic compounds	Imidazopyrimidines	Purines and purine derivatives	-	-	-	1.11845	1.50197e-05	-7.08438	1.00168	0.000845329	-2.88651	-	-	-	1.18487	2.23876e-05	-9.56159	-	-	-	1.01002	5.6029e-05	6.35287	1.00891	8.53439e-05	-5.59792
144	87.23	428.1	C8H6O4	benzene-1,4-dicarboxylic acid	Phenylpropanoids and polyketides	Phenolic acids	Phenolic acids	-	-	-	-	-	-	1.00816	7.16488e-06	-14.7795	1.55442	2.44045e-07	-32.4523	1.52732	4.6146e-06	-21.4816	1.53158	2.7381e-07	-14.7795	1.38873	6.08904e-06	15.4866	1.18149	3.64829e-05	-9.23078
146	90.15	402.3	C27H38F6O3	(5Z,7E)-(1S,3R)-26,26,26,27,27,27-hexafluoro-9,10-seco-5,7,10(19)-cholestatriene-1,3,24-triol	Lipids and lipid-like molecules	Secosteroids	Vitamin D3 and derivative	1.41057	3.45894e-05	7.81728	-	-	-	-	-	-	-	-	-	-	-	-	-	-	-	-	-	-	-	-	-
147	<70	201.2						1.23488	0.000107475	4.8427	-	-	-	-	-	-	-	-	-	-	-	-	-	-	-	-	-	-	-	-	-
150	87.62	470.1	C18H22N6O7S	(2S)-2-amino-5-[[(2R)-3-[2-(4-azidophenyl)-2-oxoethyl]sulfanyl-1-(carboxymethylamino)-1-oxopropan-2-yl]amino]-5-oxopentanoic acid	Organic acids and derivatives	Carboxylic acids and derivatives	Amino acids, peptides, and analogues	-	-	-	1.25279	8.22601e-06	-9.8677	-	-	-	1.11057	1.37175e-05	-7.89558	1.11334	4.70398e-05	-7.49455	1.14498	3.289e-06	-5.83063	1.07625	6.06146e-05	6.41255	1.17527	2.90612e-05	-8.22523
151	87.31	68.06						-	-	-	-	-	-	-	-	-	1.05745	1.80595e-05	-7.05966	1.04382	6.38001e-05	-6.61741	-	-	-	1.01467	0.000209662	4.32503	-	-	-
153	98.66	354.1	C13H21N3O8	L-Aspartyl-L-aspartyl-L-valine	Organic acids and derivatives	Amino acids and peptides	Tripeptides	-	-	-	-	-	-	-	-	-	1.32159	2.03222e-06	-16.8629	1.23956	2.14436e-05	-11.822	1.25332	2.06314e-06	-7.81789	1.04655	6.42774e-05	7.36623	-	-	-
156	88	208	C6H15NO	2-(diethylamino)ethan-1-ol	Organic nitrogen compounds	Organonitrogen compounds		-	-	-	-	-	-	1.12158	9.47026e-05	-6.82411	0.997352	1.8231e-05	-8.00572	-	-	-	1.1387	2.87661e-06	-6.82411	-	-	-	-	-	-
158	99.23	316.1	C11H22O3	3-hydroxy-undecanoic acid	Lipids and lipid-like molecules	Fatty Acids and Conjugates	Hydroxy fatty acids	-	-	-	-	-	-	-	-	-	1.40749	1.23711e-06	-19.2455	1.29281	2.63207e-05	-11.0827	1.30048	1.5167e-06	-8.70353	1.19803	3.9877e-05	8.54184	1.09001	0.000116647	-5.84065
160	99.61	412.1	C6H8N2O2	1,3-dimethyl-1,2,3,4-tetrahydropyrimidine-2,4-dione	Organo heterocyclic compounds	Pyrimidines	Other pyrimidines	-	-	-	-	-	-	-	-	-	1.27405	1.91127e-06	-15.5751	1.25692	2.30873e-05	-10.5685	1.23186	2.21153e-06	-7.08712	1.03218	5.23636e-05	7.31594	-	-	-
162	99.92	488.1	C20H24O6	[(3aR,4R,6E,10E,11aR)-6,10-dimethyl-3-methylene-2-oxo-3a,4,5,8,9,11a-hexahydrocyclodeca[b]furan-4-yl] (E)-4-hydroxy-2-(hydroxymethyl)but-2-enoate	Lipids and lipid-like molecules	Prenol lipids	Sesquiterpenoids	-	-	-	-	-	-	-	-	-	1.1979	7.76145e-06	-10.0313	1.26014	3.2766e-05	-9.15988	1.0473	6.97744e-06	-4.88126	1.14744	4.33345e-05	7.37858	-	-	-
170	99.61	224.19						-	-	-	1.1277	4.18319e-05	4.1871	-	-	-	-	-	-	-	-	-	-	-	-	-	-	-	-	-	-
172	74.5	224.1	C18H21NO3	(4R,4aR,7S,7aR,12bS)-7-methoxy-3-methyl-2,4,4a,7,7a,13-hexahydro-1H-4,12-methanobenzofuro[3,2-e]isoquinoline-9-ol	Organic nitrogen compounds	Alkaloids and derivatives	Morphinans	-	-	-	-	-	-	-	-	-	1.43399	9.25967e-07	-18.203	1.42095	9.27594e-06	-14.3147	1.19048	1.48401e-06	-7.97885	1.13304	3.93516e-05	7.9146	-	-	-
175	<70	231.9						1.03157	3.41947e-05	-7.09517	-	-	-	-	-	-	1.31596	3.31569e-06	-12.3868	1.2928	9.39452e-06	-13.5716	-	-	-	1.2956	1.92e-05	9.48249	1.24763	1.82705e-05	-9.81798
176	96.78	412.1	C44H88NO9P	1-octadecyl-2-eicosanoyl-glycero-3-phosphoserine	Lipids and lipid-like molecules	Glycerolipids	1-alkyl,2-acylglycerophosphoserines	-	-	-	-	-	-	-	-	-	1.566	2.66167e-07	-24.0657	1.2988	1.54713e-05	-11.6416	1.29049	9.95318e-07	-8.73717	1.22225	1.17573e-05	10.7861	-	-	-
178	<70	92						1.12167	4.38147e-05	7.18898	1.38002	1.27374e-05	8.98055	1.37357	7.64757e-05	7.84728	1.42243	1.88407e-06	18.1669	-	-	-	1.24272	2.36086e-06	7.84728	1.44527	1.17445e-05	13.2451	1.1974	8.13279e-05	6.73139
179	86.89	303.2	C9H8O4	3-(3-hydroxyphenyl)-2-oxopropanoic acid	Benzenoids	Benzene and substituted derivatives	Phenylpyruvic acid derivatives	-	-	-	1.08719	1.81925e-05	-5.84622	-	-	-	-	-	-	-	-	-	-	-	-	-	-	-	-	-	-
181	95.62	560.1	C32H64NO6P	CerP(d18:1/14:0)	Lipids and lipid-like molecules	Ceramides	Ceramide 1-phosphates	-	-	-	-	-	-	-	-	-	1.61168	2.14494e-07	-31.4243	1.44474	8.90342e-06	-16.5344	1.42654	4.76072e-07	-12.136	1.27999	1.23766e-05	12.3437	1.09343	6.6865e-05	-7.16771
182	87.21	572.1	C8H12O4	4Z-octenedioic acid	Lipids and lipid-like molecules	Fatty Acids and Conjugates	Dicarboxylic acids	1.17808	1.35631e-05	-6.02823	1.34867	4.79242e-06	-6.59247	1.08837	7.43836e-05	-4.08316	-	-	-	-	-	-	1.08675	2.29172e-06	-4.08316	1.0993	2.67968e-05	5.05775	1.32171	1.4706e-05	-5.91774
186	99.79	208.05						-	-	-	1.12053	9.41959e-06	-7.191	1.00061	1.90049e-05	-8.08491	1.03833	1.12729e-05	-6.82947	-	-	-	1.41988	7.14552e-07	-8.08491	-	-	-	1.14434	4.95668e-05	-5.9111
187	<70	701.5						1.3996	4.27549e-05	-6.63684	1.02736	2.62363e-05	-5.29147	1.11029	0.000530673	-3.57451	1.39736	7.17045e-06	-10.2519	0.999183	7.77962e-05	-6.43482	-	-	-	1.11576	8.85155e-05	5.9997	1.08938	0.000115459	-5.27123
188	<70	299.9						1.19289	1.00885e-05	-8.28091	1.10149	1.05482e-05	-5.80832	1.1726	0.000642428	-2.58111	-	-	-	-	-	-	-	-	-	-	-	-	-	-	-
189	<70	412.1						-	-	-	-	-	-	-	-	-	1.39143	5.70861e-07	-18.0009	1.35896	6.8741e-06	-14.1504	1.51323	1.62572e-07	-12.4378	1.21591	1.30488e-05	9.7079	-	-	-
190	93.67	298.1	C40H80NO8P	1-tridecanoyl-2-docosanoyl-glycero-3-phosphoethanolamine	Lipids and lipid-like molecules	Glycerolipids	Diacylglycerophosphoethanolamines	-	-	-	-	-	-	-	-	-	1.15509	9.82875e-06	-10.1717	1.10882	4.83676e-05	-8.32423	1.4316	1.60926e-06	-8.45029	-	-	-	-	-	-
196	<70	785.5						-	-	-	-	-	-	-	-	-	1.01706	0.00010842	-3.96453	-	-	-	1.15991	1.05562e-05	-4.0188	-	-	-	-	-	-
200	<70	336.2						-	-	-	1.15911	2.47558e-05	-5.01998	1.35196	0.000253995	-4.35038	-	-	-	-	-	-	1.07322	7.34705e-06	-4.35038	-	-	-	-	-	-
201	<70	486.1						-	-	-	-	-	-	-	-	-	1.5884	1.95433e-07	-26.7881	1.46729	7.38909e-06	-15.6025	1.43443	4.41688e-07	-11.0483	1.44937	4.41052e-06	13.8772	-	-	-
203	87.71	171.2	C10H20O2	3-hydroxydecan-2-one	Lipids and lipid-like molecules	Fatty Acids and Conjugates	Oxygenated hydrocarbons	-	-	-	1.54059	4.19913e-06	-15.966	1.14137	1.29332e-05	-11.289	1.36015	1.7655e-06	-15.8503	1.65616	1.58498e-06	-25.345	1.48087	4.78743e-07	-11.289	1.44243	5.57468e-06	13.7585	1.85881	1.33314e-06	-20.1773
204	70.85	572.1	C24H12O2	hexacyclo[10.10.2.02,7.09,23.013,18.020,24]tetracosa-1(23),2,4,6,9,11,13,15,17,20(24),21-undecaene-8,19-dione	Benzenoids	Pyrenes	Benzopyrenes	-	-	-	1.12688	1.04563e-05	-6.2056	1.07713	0.000412101	-3.11385	-	-	-	-	-	-	-	-	-	0.99684	8.27364e-05	4.54352	-	-	-
205	86.53	208.35						1.55997	3.21765e-06	23.8266	-	-	-	1.43327	3.75693e-05	8.76125	1.82522	2.68584e-07	28.6801	1.21627	1.69283e-05	12.145	1.34073	1.30604e-06	8.76125	1.74761	1.30159e-06	21.1561	1.1845	3.53901e-05	8.54026
208	98.21	428.1	C40H80NO11P	[(2S,3R)-2-(hexadecanoylamino)-3-hydroxyoctadecyl] [(5R)-2,3,4,5,6-pentahydroxycyclohexyl] hydrogen phosphate	Lipids and lipid-like molecules	Phosphosphingolipids	Ceramide phosphoinositols	-	-	-	-	-	-	-	-	-	1.29299	2.37518e-06	-15.4001	1.1863	3.5173e-05	-9.42674	1.29518	1.77849e-06	-7.99512	1.08926	4.34728e-05	8.08743	-	-	-
209	97.99	741.5	C38H74NO9P	1-(1Z-hexadecenyl)-2-hexadecanoyl-glycero-3-phosphoserine	Lipids and lipid-like molecules	Glycerophospholipids	Glycerophosphoserines	1.09876	7.2425e-05	-5.34569	-	-	-	1.13221	9.24969e-05	-6.25917	1.29544	2.07292e-05	-7.27319	1.0107	0.000146696	-5.1685	1.42078	2.80404e-06	-6.25917	1.27317	8.21955e-05	6.20415	-	-	-
215	87.71	172.26						-	-	-	-	-	-	-	-	-	1.02485	3.89015e-05	-5.40235	-	-	-	-	-	-	1.04966	0.000368658	3.57453	-	-	-
217	86.53	208.19						1.30707	8.243e-06	-13.7629	1.33426	7.108e-06	-10.4801	1.38675	0.000301117	-4.23831	-	-	-	-	-	-	-	-	-	1.04914	3.07634e-05	7.63785	-	-	-
220	<70	470.1						-	-	-	1.6273	3.23529e-06	-15.1195	1.13111	4.26579e-05	-5.83677	-	-	-	1.33358	1.01222e-05	-9.47185	1.18514	1.48653e-06	-5.83677	-	-	-	1.52091	4.72317e-06	-10.108
221	97.99	720						-	-	-	1.24473	1.13568e-05	-6.18318	1.02412	0.000468702	-3.09498	-	-	-	-	-	-	-	-	-	-	-	-	1.16022	6.38151e-05	-4.96889
222	99.78	915.53						0.995447	4.55335e-05	-5.70315	-	-	-	-	-	-	-	-	-	-	-	-	-	-	-	-	-	-	-	-	-
230	96.23	745.5	C17H26O4	2-[5,8-dimethyl-2,6-dioxatricyclo[6.4.0.0^[1,5]]dodec-3-en-11-yl]propan-2-yl acetate	Lipids and lipid-like molecules	Isoprenoids	isoprenoids	-	-	-	-	-	-	-	-	-	1.0554	6.1154e-05	-4.66126	-	-	-	-	-	-	-	-	-	-	-	-
236	97.5	354.1	C27H53O11P	1-(1Z-octadecenyl)-glycero-3-phospho-(1'-myo-inositol)	Lipids and lipid-like molecules	Glycerolipids	1Z-alkenylglycerophosphoinositols	-	-	-	-	-	-	-	-	-	1.28057	1.91663e-06	-16.249	1.39671	4.55209e-06	-18.9817	1.47428	4.20057e-07	-12.2057	1.08194	2.84699e-05	9.361	1.00275	7.85783e-05	-6.52023
237	99.54	346.2	C10H20O3	3S-hydroxy-decanoic acid	Lipids and lipid-like molecules	Fatty Acids and Conjugates	Hydroxy fatty acids	-	-	-	1.10878	2.14662e-05	4.46862	-	-	-	-	-	-	-	-	-	1.02497	1.05408e-05	3.32678	-	-	-	-	-	-
241	71.02	466.1	C27H52	9,10-Heptacosadiene				1.04225	1.57303e-05	-7.37517	-	-	-	-	-	-	-	-	-	-	-	-	-	-	-	-	-	-	-	-	-
246	96.79	488.1	C42H84NO11P	N-(octadecanoyl)-sphinganine-1-phospho-(1'-myo-inositol)	Lipids and lipid-like molecules	Phosphosphingolipids	Ceramide phosphoinositols	1.08429	3.0664e-05	-6.56647	1.05393	2.74833e-05	-4.52636	1.19811	5.3129e-05	-5.79163	1.26409	2.26873e-06	-10.3612	1.21525	1.47358e-05	-9.09264	1.12539	1.7799e-06	-5.79163	1.10102	2.31323e-05	7.07523	-	-	-
247	79.48	436.24						1.19877	1.27872e-05	10.249	1.13304	1.37485e-05	6.39488	1.17205	0.00162135	2.21066	-	-	-	-	-	-	-	-	-	-	-	-	-	-	-
251	75.34	871.5	C50H87N3O15P2	[([[(2R,3R,5R)-5-(4-amino-2-oxo-1,2-dihydropyrimidin-1-yl)-3,4-dihydroxyoxolan-2-yl]methoxy](hydroxy)phosphoryl)oxy][(2R)-2-[(10Z,13Z,16Z)-docosa-10,13,16-trienoyloxy]-3-(hexadecanoyloxy)propoxy]phosphinic acid	Lipids and lipid-like molecules	Glycerolipids	CDP-glycerols	1.24306	1.01047e-05	-11.5968	1.19648	8.65332e-06	-9.17993	1.21398	0.000397946	-3.75384	1.10233	1.5148e-05	-7.17302	1.06582	4.38103e-05	-7.19425	-	-	-	1.19668	1.36115e-05	8.93579	1.1288	3.93357e-05	-6.97898
252	86.39	127.1	C33H62O8	6,14,22,30,32-pentahydroxytritriacontane-8,16,24-trione	Lipids and lipid-like molecules	Fatty Acids and Conjugates	Fatty alcohols	1.02583	5.66223e-05	5.59134	-	-	-	-	-	-	-	-	-	-	-	-	-	-	-	-	-	-	-	-	-
255	75.48	1329.6						1.14958	2.13344e-05	-7.89815	-	-	-	-	-	-	-	-	-	-	-	-	-	-	-	-	-	-	-	-	-
256	<70	86						-	-	-	1.37924	9.08187e-06	9.8639	1.44388	0.00141562	2.44797	-	-	-	-	-	-	-	-	-	-	-	-	1.16066	0.000138929	4.94402
257	97.94	104	C29H57O12P	1-eicosanoyl-glycero-3-phospho-(1'-myo-inositol)	Lipids and lipid-like molecules	Glycerolipids	Monoacylglycerophosphoinositols	-	-	-	1.20124	1.66518e-05	-6.31122	-	-	-	-	-	-	-	-	-	-	-	-	-	-	-	-	-	-
261	85.63	280	C9H16O2	(5S)-5-pentyltetrahydrofuran-2-one	Organo heterocyclic compounds	Lactones	Gamma butyrolactones	-	-	-	-	-	-	-	-	-	1.56528	4.18335e-07	-23.9271	1.37277	1.02818e-05	-14.21	1.57294	1.79766e-07	-14.672	1.29027	9.5005e-06	12.3738	1.00405	9.72381e-05	-5.96374
265	87.66	250.2	C7H13NO	butyl (2S)-2-aminopropanoate				-	-	-	-	-	-	-	-	-	1.06717	9.82931e-06	-7.50606	1.06396	5.75791e-05	-5.96204	-	-	-	-	-	-	-	-	-
267	95.72	346.3	C37H74NO8P	1-eicosanoyl-2-dodecanoyl-glycero-3-phosphoethanolamine	Lipids and lipid-like molecules	Glycerolipids	Diacylglycerophosphoethanolamines	0.996673	0.000167936	2.94066	-	-	-	-	-	-	-	-	-	-	-	-	-	-	-	-	-	-	-	-	-
268	96.4	448.1	C46H70NO10P	(2S)-2-amino-3-[[(2R)-3-[(4Z,7Z,10Z,13Z,16Z,19Z)-docosa-4,7,10,13,16,19-hexaenoyl]oxy-2-[(6Z,9Z,12Z,15Z)-octadeca-6,9,12,15-tetraenoyl]oxypropoxy]-hydroxyphosphoryl]oxypropanoic acid	Lipids and lipid-like molecules	Glycerolipids	Diacylglycerophosphoserines	1.21338	1.28206e-05	-8.94647	-	-	-	1.11507	0.000728122	-2.71231	-	-	-	-	-	-	-	-	-	-	-	-	-	-	-
269	87.71	797.5	C4H8O3	3-hydroxy-2-methylpropanoic acid	Lipids and lipid-like molecules	Fatty Acids and Conjugates	Hydroxy FA	-	-	-	-	-	-	-	-	-	-	-	-	1.03875	9.28235e-05	-6.10267	-	-	-	-	-	-	0.998076	0.000130225	-5.0794
276	92.17	577.4	C38H71O10P	1-tetradecanoyl-2-(9Z,12Z-octadecadienoyl)-glycero-3-phospho-(1'-sn-glycerol)	Lipids and lipid-like molecules	Glycerolipids	Diacylglycerophosphoglycerols	1.24018	0.000138274	3.12065	1.04814	6.83969e-05	2.82486	-	-	-	1.5518	4.44798e-06	9.79239	1.32878	1.98992e-05	8.80822	1.27965	5.13708e-06	4.72325	1.19799	0.000105741	4.91556	1.19238	0.000134583	4.32948
277	83.84	297.1	C17H17NO5	1-hydroxy-3,5,6-trimethoxy-10-methylacridin-9-one	Organo heterocyclic compounds	Quinolines and derivatives	Benzoquinolines	-	-	-	1.47713	3.7411e-06	-14.2968	1.22493	2.83441e-05	-8.02793	1.37316	7.89462e-07	-16.4864	1.58979	1.73071e-06	-20.9552	1.29501	1.02934e-06	-8.02793	1.14832	1.81002e-05	8.87678	1.44638	6.68428e-06	-11.8419
281	97.98	308.1	C19H22N6O4	L-Tryptophanyl-glycyl-L-histidine	Organic acids and derivatives	Amino acids and peptides	Tripeptides	-	-	-	1.095	1.57497e-05	-6.58563	-	-	-	-	-	-	-	-	-	-	-	-	-	-	-	-	-	-
289	95.35	219.2	C33H62NO8P	1,2-di-(9Z-tetradecenoyl)-sn-glycero-3-phosphoethanolamine	Lipids and lipid-like molecules	Glycerolipids	Glycerophosphoethanolamines	1.04901	3.89906e-05	-5.74117	1.40344	5.1568e-06	-10.4962	1.33985	0.000254686	-4.06122	0.997899	2.17252e-05	-5.84122	-	-	-	-	-	-	-	-	-	1.15508	5.9499e-05	-5.64946
290	97.48	199.2	C64H116N2O26	Ganglioside GM2 (d18:0/14:0)	Lipids and lipid-like molecules	Sphingolipids	Glycosphingolipids	-	-	-	1.13482	1.14501e-05	-7.35634	-	-	-	-	-	-	-	-	-	-	-	-	-	-	-	-	-	-
294	98.84	847.62						-	-	-	-	-	-	1.09996	0.000430521	-3.83572	1.02711	3.91599e-05	-5.5652	1.23912	3.58883e-05	-8.40863	1.02278	1.27713e-05	-3.83572	-	-	-	1.04295	0.000240052	-3.98228
296	99.37	974.15						1.25739	8.93841e-05	3.88558	1.15515	4.06548e-05	3.66081	1.24483	1.9735e-05	8.39525	1.55742	2.73257e-06	11.3342	1.207	3.95145e-05	7.22862	1.57796	7.45644e-07	8.39525	1.3072	6.72667e-05	5.67615	1.14519	0.000147893	4.27732
297	99.78	250.2	C17H32O2	10Z-heptadecenoic acid	Lipids and lipid-like molecules	Fatty Acids and Conjugates	Unsaturated FA	-	-	-	1.13756	1.13791e-05	-6.37263	1.07847	2.01374e-06	-13.9254	1.69357	5.95995e-08	-26.8233	1.39883	1.81127e-06	-16.7106	1.73558	8.33693e-08	-13.9254	1.55736	9.1852e-07	15.3365	1.28443	1.14703e-05	-8.77606
298	71.23	141.1	C30H52O2	24-methyl-poriferast-5-en-3beta,28-diol	Lipids and lipid-like molecules	Steroids and steroid derivatives	Stigmasterols and C24-ethyl derivatives	1.32911	6.23985e-05	4.8359	-	-	-	-	-	-	-	-	-	-	-	-	-	-	-	-	-	-	-	-	-
299	98.67	375.3	C15H30N6O4	(2S)-2-[[(2S)-2-[[(2S)-2-amino-5-(diaminomethylideneamino)pentanoyl]amino]propanoyl]amino]-4-methylpentanoic acid	Organic acids and derivatives	Carboxylic acids and derivatives	Amino acids, peptides, and analogues	-	-	-	1.3498	4.71118e-06	-12.7695	1.21759	3.79079e-05	-7.16802	1.26599	2.73599e-06	-11.5293	1.21315	3.02245e-05	-8.25268	1.25137	1.31972e-06	-7.16802	1.14086	2.55609e-05	7.82677	1.1676	2.48907e-05	-8.07811
302	99.59	703.51						-	-	-	1.13957	2.74921e-05	5.04687	1.11154	0.000481459	3.64106	-	-	-	-	-	-	1.16302	1.44472e-05	3.64106	-	-	-	1.24274	0.000426361	3.14408
308	95.15	384.2	C36H72NO8P	1-dodecanoyl-2-nonadecanoyl-glycero-3-phosphoethanolamine	Lipids and lipid-like molecules	Glycerolipids	Diacylglycerophosphoethanolamines	1.01536	2.49931e-05	-6.45252	-	-	-	-	-	-	-	-	-	-	-	-	-	-	-	-	-	-	-	-	-
313	99.78	268.4						-	-	-	-	-	-	-	-	-	1.32266	2.03886e-06	-12.7661	1.33792	1.02098e-05	-11.9986	1.17138	2.0789e-06	-6.34053	1.10147	4.31649e-05	6.75604	-	-	-
318	95.17	562.1	C38H76NO9P	1-eicosyl-2-dodecanoyl-glycero-3-phosphoserine	Lipids and lipid-like molecules	Glycerolipids	1-alkyl,2-acylglycerophosphoserines	-	-	-	-	-	-	-	-	-	1.36307	1.12503e-06	-13.1625	1.30463	1.03415e-05	-10.7445	1.51892	1.909e-07	-10.3085	1.08836	2.608e-05	7.26329	1.07384	4.6699e-05	-6.24228
323	97.63	680.8						-	-	-	1.29331	2.05996e-05	5.13415	-	-	-	-	-	-	-	-	-	-	-	-	-	-	-	-	-	-
327	92.09	756.17						-	-	-	1.0058	1.30034e-05	-5.73764	-	-	-	1.12898	4.15199e-06	-8.16947	1.06593	1.69624e-05	-7.86284	-	-	-	-	-	-	-	-	-
328	98.85	263	C46H84NO8P	1-heneicosanoyl-2-(5Z,8Z,11Z,14Z-eicosatetraenoyl)-glycero-3-phosphoethanolamine	Lipids and lipid-like molecules	Glycerolipids	Diacylglycerophosphoethanolamines	-	-	-	-	-	-	-	-	-	1.13712	2.66573e-06	-8.91178	1.19059	9.31767e-06	-9.31906	1.07148	1.9009e-06	-5.3629	1.04172	3.43433e-05	5.82591	1.21789	1.47007e-05	-7.42497
332	94.49	691.4	C40H78NO9P	1-(1Z-eicosenyl)-2-tetradecanoyl-glycero-3-phosphoserine	Lipids and lipid-like molecules	Glycerolipids	1-(1Z-alkenyl),2-acylglycerophosphoserines	-	-	-	-	-	-	-	-	-	-	-	-	1.02225	0.000135725	-5.23658	-	-	-	-	-	-	-	-	-
333	<70	218						-	-	-	-	-	-	1.01916	1.89373e-05	9.98629	1.19953	6.52481e-06	10.5643	1.0858	4.36341e-05	7.77169	1.4119	7.12735e-07	9.98629	-	-	-	-	-	-
338	<70	272.1						-	-	-	-	-	-	-	-	-	1.11815	8.25066e-06	-8.83533	-	-	-	-	-	-	-	-	-	-	-	-
344	77.79	594.1	C16H17NO9	2-oxo-8-[(2S,3R,4S,5S,6R)-3,4,5-trihydroxy-6-(hydroxymethyl)oxan-2-yl]oxy-1H-quinoline-4-carboxylic acid	Organic oxygen compounds	Organooxygen compounds	Carbohydrates and carbohydrate conjugates	1.04231	3.01332e-05	-5.63287	-	-	-	-	-	-	-	-	-	-	-	-	-	-	-	1.03842	0.00013238	3.98829	-	-	-
346	79.71	306	C26H32O14	methyl (1S,4aR,6S,7R,7aS)-4a,7-dihydroxy-6-[(E)-3-(4-hydroxyphenyl)prop-2-enoyl]oxy-7-methyl-1-[(2S,3R,4S,5S,6R)-3,4,5-trihydroxy-6-(hydroxymethyl)oxan-2-yl]oxy-1,5,6,7a-tetrahydrocyclopenta[c]pyran-4-carboxylate				-	-	-	-	-	-	-	-	-	1.04878	1.63231e-05	-7.23229	0.995409	0.000134271	-5.02736	-	-	-	1.04194	8.53327e-05	5.55042	1.07898	0.000796908	-2.41205
351	80.77	291.2	C18H28O3	1-(4-hydroxy-3-methoxyphenyl)undecan-3-one	Benzenoids	Phenols	Methoxyphenols	-	-	-	1.1661	3.20505e-05	-4.63879	1.0351	0.000483802	-3.68513	1.09105	3.81503e-05	-5.58885	1.07496	0.000129522	-5.14283	-	-	-	-	-	-	1.2343	0.000117408	-5.11364
357	99.6	599.5	C24H35NO3	(12-methyl-6-methylidene-17-oxa-14-azahexacyclo[10.6.3.15,8.01,11.02,8.014,18]docosan-7-yl) acetate	Lipids and lipid-like molecules	Prenol lipids	Terpene	-	-	-	-	-	-	-	-	-	-	-	-	0.999307	9.45788e-05	6.88862	-	-	-	1.04911	0.000220239	5.0758	-	-	-
359	99.41	197.2	C27H32O16	7-hydroxy-2-[4-hydroxy-3-[(2S,3R,4R,5S,6R)-3,4,5-trihydroxy-6-(hydroxymethyl)oxan-2-yl]oxyphenyl]-5-[(2S,3R,4R,5S,6R)-3,4,5-trihydroxy-6-(hydroxymethyl)oxan-2-yl]oxy-2,3-dihydrochromen-4-one	Phenylpropanoids and polyketides	Flavonoids	Flavones and Flavonols	-	-	-	-	-	-	-	-	-	1.06428	1.72339e-05	-6.84387	-	-	-	1.20483	1.89522e-06	-6.49528	-	-	-	0.996822	9.1762e-05	-5.16359
366	99.89	797.9						-	-	-	1.17113	3.14816e-05	4.52392	-	-	-	1.10532	1.78394e-05	7.20714	-	-	-	1.05488	6.68284e-06	4.67698	-	-	-	-	-	-
369	99.58	886.04						1.03697	6.87386e-05	5.6382	0.997325	6.20108e-05	3.67241	-	-	-	1.3612	7.23829e-06	12.6406	1.40641	1.28672e-05	15.4679	1.28871	3.49733e-06	7.21975	1.19484	7.04658e-05	7.6463	1.42629	2.91574e-05	10.7535
370	80.79	563.3	C18H31NO3	(S,Z)-N-(2-Oxotetrahydrofuran-3-yl)tetradec-9-enamide	Lipids and lipid-like molecules	Fatty Acids and Conjugates	Amino fatty acids	-	-	-	-	-	-	-	-	-	1.0628	5.45082e-05	4.25546	-	-	-	1.01419	1.0821e-05	3.49132	-	-	-	1.13444	0.000477683	2.67297
373	96.6	85.1	C40H77O10P	1-(9Z-nonadecenoyl)-2-pentadecanoyl-glycero-3-phospho-(1'-sn-glycerol)	Lipids and lipid-like molecules	Glycerolipids	Diacylglycerophosphoglycerols	1.14077	0.000181469	4.15622	-	-	-	-	-	-	-	-	-	-	-	-	-	-	-	-	-	-	-	-	-
374	99.49	872.02						-	-	-	-	-	-	1.00667	0.000166425	-4.25699	1.00375	8.36968e-06	-7.18043	-	-	-	-	-	-	1.11076	2.80299e-05	6.55412	-	-	-
375	88.39	486.1	C21H22O13	(2S,3S,4S,5R,6R)-6-[[(2R,3R)-5,7-dihydroxy-2-(3,4,5-trihydroxyphenyl)-3,4-dihydro-2H-chromen-3-yl]oxy]-3,4,5-trihydroxyoxane-2-carboxylic acid	Phenylpropanoids and polyketides	Flavonoids	Flavonoid glycosides	-	-	-	1.14912	4.82978e-06	-8.72154	-	-	-	1.10631	7.49427e-06	-6.90005	1.14528	2.59944e-05	-6.74135	0.997834	4.61346e-06	-4.16696	-	-	-	1.03858	2.9106e-05	-5.9999
387	86.52	631.4	C31H55NO10	Organic acids and derivatives	Organic acids and derivatives	Carboxylic acids and derivatives	Tricarboxylic acids and derivatives	1.27195	1.55787e-05	-7.87537	-	-	-	-	-	-	-	-	-	-	-	-	-	-	-	1.09396	3.92023e-05	5.7373	-	-	-
389	92.7	470.1	C28H56NO9P	1-docosanoyl-glycero-3-phosphoserine	Lipids and lipid-like molecules	Glycerolipids	Monoacylglycerophosphoserines	-	-	-	-	-	-	-	-	-	1.02831	1.25058e-05	-7.88154	1.10006	3.28198e-05	-8.33544	1.07061	2.50463e-06	-6.15107	-	-	-	-	-	-
392	87.35	813.6	C3H8N2O2	2S,3-diamino-propionic acid	Organic acids and derivatives	Carboxylic acids and derivatives	Amino acids, peptides, and analogues	-	-	-	-	-	-	-	-	-	1.18031	1.45692e-05	8.40992	-	-	-	-	-	-	-	-	-	-	-	-
398	86.52	332.2	C14H24O3	(1S,2S)-3-oxo-2-pentyl-cyclopentanebutanoic acid	Lipids and lipid-like molecules	Fatty Acids and Conjugates	Octadecanoids	-	-	-	1.53159	6.01161e-06	11.1287	-	-	-	-	-	-	1.24217	2.11521e-05	9.65534	-	-	-	-	-	-	1.35454	2.45068e-05	8.7104
412	94.47	474.3	C28H55O12P	1-nonadecanoyl-glycero-3-phospho-(1'-myo-inositol)	Lipids and lipid-like molecules	Glycerolipids	Monoacylglycerophosphoinositols	1.1236	1.74135e-05	-10.0147	1.26696	8.95605e-06	-9.44848	-	-	-	-	-	-	-	-	-	-	-	-	-	-	-	-	-	-
421	92.41	280.2	C21H40N4O12	(2R,3R,4S,5S,6R)-2-[[(2R,3S,4R,4aR,6S,7R,8aS)-7-amino-6-[(1R,2R,3S,4R,6S)-4,6-diamino-2,3-dihydroxycyclohexyl]oxy-4-hydroxy-3-(methylamino)-2,3,4,4a,6,7,8,8a-octahydropyrano[3,2-b]pyran-2-yl]oxy]-6-(hydroxymethyl)oxane-3,4,5-triol	Organic oxygen compounds	Organooxygen compounds	Carbohydrates and carbohydrate conjugates	1.04535	3.16334e-05	-6.54747	-	-	-	1.02629	0.000270109	-4.0082	-	-	-	-	-	-	-	-	-	-	-	-	-	-	-
426	<70	264.1						1.33901	2.47178e-05	-9.73074	-	-	-	-	-	-	-	-	-	-	-	-	-	-	-	-	-	-	-	-	-
427	94.83	555.4	C32H63NO5S	(E,2R,3R)-3-hydroxy-2-(tetradecanoylamino)octadec-4-ene-1-sulfonic acid	Lipids and lipid-like molecules	Fatty Acids and Conjugates	Fatty amides	-	-	-	1.39892	8.03544e-06	11.5169	1.07738	1.2341e-05	13.7444	1.28153	2.71396e-06	15.9651	1.41512	8.35702e-06	17.1431	1.52262	4.5983e-07	13.7444	1.35581	1.94139e-05	11.482	1.45721	8.28923e-06	15.2666
428	77.92	69.1	C40H68NO10P	1-(9Z-hexadecenoyl)-2-(6Z,9Z,12Z,15Z-octadecatetraenoyl)-glycero-3-phosphoserine	Lipids and lipid-like molecules	Glycerolipids	Diacylglycerophosphoserines	-	-	-	1.16024	1.60428e-05	8.48756	-	-	-	-	-	-	1.17754	2.98896e-05	11.7238	1.06434	4.85951e-06	6.49794	-	-	-	1.10845	5.66231e-05	8.46062
430	96.21	364.1	C36H59NO11	[(2R,3R,4E,6E,9R,11S,12S,13S,14E)-2-ethyl-9,11,13-trimethyl-8,16-dioxo-12-[[3,4,6-trideoxy-3-(dimethylamino)-beta-D-xylo-hexopyranosyl]oxy]oxacyclohexadeca-4,6,14-trien-3-yl]methyl 6-deoxy-2-O-methyl-beta-D-allopyranoside	Organic oxygen compounds	Organooxygen compounds	Carbohydrates and carbohydrate conjugates	1.00729	7.94368e-05	5.40035	-	-	-	1.1068	0.000759664	3.47291	-	-	-	-	-	-	-	-	-	-	-	-	-	-	-
434	86.59	72.1	C30H53NO11	2,5,8,11,14,17,20,23,26-nonaoxaoctacosan-28-yl 4-(butylamino)benzoate	Benzenoids	Benzene and substituted derivatives	Benzoic acids and derivatives	1.08904	0.000104906	5.15232	-	-	-	-	-	-	-	-	-	-	-	-	-	-	-	-	-	-	-	-	-
435	99.57	643.48						-	-	-	1.88438	7.5146e-07	35.0632	1.52726	2.45211e-06	17.3479	1.59347	2.42139e-07	27.8723	1.95316	3.00052e-07	42.0838	1.71336	9.88463e-08	17.3479	1.39404	5.60592e-06	13.4736	2.01139	4.15301e-07	28.5917
436	72.22	631.8						1.00592	2.10965e-05	-8.1905	1.43323	7.83429e-06	-9.21411	1.44402	0.000295359	-4.20737	-	-	-	-	-	-	1.03135	8.59537e-06	-4.20737	-	-	-	1.06928	6.22015e-05	-5.82014
440	97.46	120	C22H46NO7P	1-heptadecanoyl-glycero-3-phosphoethanolamine	Lipids and lipid-like molecules	Glycerolipids	Glycerophosphoethanolamines	1.28162	6.78712e-05	6.84719	-	-	-	-	-	-	-	-	-	-	-	-	-	-	-	-	-	-	1.13722	0.000332173	4.37547
444	81.52	533.3	C43H55N5O7	methyl (13S,15S,17S)-13-[(1R,9R,10S,11R,12R,19R)-10-carbamoyl-12-ethyl-10,11-dihydroxy-5-methoxy-8-methyl-8,16-diazapentacyclo[10.6.1.0^[1,9].0^[2,7].0^[16,19]]nonadeca-2(7),3,5,13-tetraen-4-yl]-17-ethyl-17-hydroxy-1,11-diazatetracyclo[13.3.1.0^[4,12].0^[5,10]]nonadeca-4(12),5,7,9-tetraene-13-carboxylate	Organic nitrogen compounds	Alkaloids and derivatives	Vinca alkaloids	1.49477	2.28816e-05	6.62093	1.16441	2.24027e-05	4.60426	1.21795	5.34259e-05	6.34311	1.37903	3.94413e-06	10.1134	1.00925	6.33705e-05	5.71352	1.28393	1.78422e-06	6.34311	1.40187	2.64199e-05	7.44938	1.29605	0.000106821	4.52627
448	97.16	145.1	C24H40O12	3b,6a-Dihydroxy-alpha-ionol 9-[apiosyl-(1->6)-glucoside]	Lipids and lipid-like molecules	Fatty Acids and Conjugates	Fatty acyl glycosides	-	-	-	1.09703	2.87903e-05	4.71743	1.08141	0.000117431	5.65571	-	-	-	1.10453	0.000112034	5.2353	1.25222	3.50843e-06	5.65571	1.05311	0.000335441	3.6803	1.32061	0.000101549	5.16634
449	99.94	158.1	C10H16N2O7	L-Glutamyl-L-glutamic acid	Organic acids and derivatives	Amino acids and peptides	Dipeptides	-	-	-	1.51321	4.08456e-06	20.4462	1.21506	0.00220631	2.07553	-	-	-	-	-	-	-	-	-	-	-	-	1.04231	8.1574e-05	7.09013
450	99.34	165.08						1.0364	3.20782e-05	7.84468	1.07048	1.60797e-05	7.00097	1.01123	0.00036579	4.23261	-	-	-	-	-	-	-	-	-	-	-	-	0.997686	0.000128606	5.11166
456	97.16	555.77						-	-	-	-	-	-	-	-	-	1.29537	3.4543e-06	17.4685	1.26566	3.81928e-05	10.9857	1.39271	8.31987e-07	12.4756	1.21982	6.53278e-05	8.38154	1.03028	0.000139858	5.90545
458	87.97	241	C6H13NO2	2-Amino-4-methylpentanoic acid	Organic acids and derivatives	Carboxylic acids and derivatives	Amino acids, peptides, and analogues	1.27062	9.56103e-05	3.99026	1.39484	1.65745e-05	5.97602	1.21432	1.96947e-05	7.86909	1.77993	8.55399e-07	14.2238	1.7764	3.55049e-06	14.9404	1.82928	7.44803e-07	7.86909	1.61118	3.81519e-05	6.6127	1.7389	2.45221e-05	7.79729
460	95.79	350.3	C17H37NO4S	2-amino-3-hydroxy-15-methylhexadecane-1-sulfonic acid	Organic acids and derivatives	Organic sulfonic acids and derivatives	Organosulfonic acids and derivatives	-	-	-	1.0571	3.8848e-05	3.60193	-	-	-	1.21661	1.31264e-05	6.78068	1.30341	1.71156e-05	8.79636	1.3241	2.80758e-06	5.37477	1.17502	0.00011501	4.53736	1.43631	2.61209e-05	7.28184
461	99.54	428.2	C9H17N3O4	Glycyl-glycyl-L-valine	Organic acids and derivatives	Amino acids and peptides	Tripeptides	-	-	-	-	-	-	-	-	-	0.995297	2.45206e-05	6.26356	-	-	-	-	-	-	-	-	-	-	-	-
463	<70	587.3						-	-	-	1.32366	1.37237e-05	6.35955	1.25527	0.000278515	3.94574	-	-	-	-	-	-	1.15361	8.15937e-06	3.94574	-	-	-	1.15169	0.00032671	3.17634
464	82.67	709.4	C38H66NO10P	(2S)-2-amino-3-[[(2R)-2-dodecanoyloxy-3-[(5Z,8Z,11Z,14Z)-icosa-5,8,11,14-tetraenoyl]oxypropoxy]-hydroxyphosphoryl]oxypropanoic acid	Lipids and lipid-like molecules	Glycerolipids	Glycerophosphoserines	-	-	-	1.13393	3.9006e-05	3.76003	1.42811	0.000167922	4.74653	1.19073	1.7894e-05	6.57104	1.06841	0.000104203	5.00464	1.03853	4.93261e-06	4.74653	1.006	0.00019419	4.11679	1.09566	0.00016395	4.03327
465	70.81	711.4	C20H32N6O5S	L-Methionyl-L-tyrosyl-L-arginine	Organic acids and derivatives	Amino acids and peptides	Tripeptides	-	-	-	-	-	-	-	-	-	1.07439	1.93555e-05	5.39841	1.02518	9.10596e-05	4.56478	-	-	-	-	-	-	-	-	-
467	87.76	442.2	C7H13NO2	8-azabicyclo[3.2.1]octane-3,6-diol	Organic nitrogen compounds	Alkaloids and derivatives	Tropane alkaloids	-	-	-	-	-	-	-	-	-	-	-	-	1.06482	0.000121067	5.68176	1.09205	4.25201e-06	6.01212	1.15157	0.000189325	4.93455	-	-	-
468	99.41	272.32						1.24945	1.7678e-05	10.1034	1.26621	1.09489e-05	8.62914	1.11751	0.000334233	4.1273	1.20247	1.42891e-05	7.8803	1.31042	1.58765e-05	11.0851	-	-	-	1.51904	9.16776e-06	11.5244	1.41894	1.65829e-05	10.0314
471	93.8	679.4	C33H57NO13	(2R)-2-[2-[(5R,6R,7S,9S,18S)-19-amino-6-[(3R)-3,4-dicarboxybutanoyl]oxy-18-hydroxy-5,9-dimethylnonadecan-7-yl]oxy-2-oxoethyl]butanedioic acid	Organic acids and derivatives	Carboxylic acids and derivatives	Hexacarboxylic acids and derivatives	1.0453	0.000354327	2.08689	0.995162	8.6601e-05	2.93269	1.27887	0.0007248	3.40748	-	-	-	1.03711	0.000418442	3.50542	1.25037	2.25908e-05	3.40748	-	-	-	1.09502	0.000803496	2.52464
475	96.26	666.5	C63H110O24	Simonin III	Organic oxygen compounds	Organooxygen compounds	Carbohydrates and carbohydrate conjugates	-	-	-	1.00555	2.06679e-05	6.52824	-	-	-	-	-	-	-	-	-	-	-	-	1.20429	4.3433e-05	7.42832	-	-	-
476	94.57	325.3	C35H70NO7P	1-(1Z-Hexadecenyl)-2-myristoyl-sn-glycero-3-phosphoethanolamine	Lipids and lipid-like molecules	Glycerolipids	Glycerophosphoethanolamines	-	-	-	-	-	-	-	-	-	1.12497	3.39081e-05	5.15527	1.18995	7.96742e-05	5.40225	1.3351	6.46498e-06	4.28176	-	-	-	1.06733	0.000244267	3.4938
477	87.52	260.1	C9H9NO2	3-hydroxy-3-methyl-2,3-dihydro-1H-indol-2-one	Organic nitrogen compounds	Alkaloids and derivatives	Indolines	1.13569	2.94084e-05	-7.96238	-	-	-	-	-	-	-	-	-	-	-	-	-	-	-	-	-	-	-	-	-
482	88.76	514.2	C10H15N3O5	4-amino-1-[(2R,3R,4S,5R)-3,4-dihydroxy-5-(hydroxymethyl)oxolan-2-yl]-5-methylpyrimidin-2-one	Organo heterocyclic compounds	Nucleosides, nucleotides, and analogues	Pyrimidine nucleosides	-	-	-	1.11204	1.09966e-05	9.34183	1.03303	1.26691e-05	11.7774	1.44235	7.13827e-07	21.0938	1.39678	1.03794e-05	14.0775	1.45897	4.73333e-07	11.7774	1.35324	1.53761e-05	10.9312	1.12937	3.65455e-05	8.27362
483	99.74	169.27						-	-	-	1.25024	1.98055e-05	-7.14869	-	-	-	-	-	-	-	-	-	-	-	-	-	-	-	1.09808	0.000150429	-5.29306
488	98.64	242.9	C26H47O12P	1-(9Z,12Z-heptadecadienoyl)-glycero-3-phospho-(1'-myo-inositol)	Lipids and lipid-like molecules	Glycerolipids	Glycerophosphoinositols	1.0062	6.0268e-05	-5.37872	-	-	-	-	-	-	-	-	-	-	-	-	-	-	-	-	-	-	-	-	-
499	98.71	117.1	C14H25N3O7	L-Threonyl-L-valyl-L-glutamic acid	Organic acids and derivatives	Amino acids and peptides	Tripeptides	-	-	-	1.034	0.000127153	3.14497	-	-	-	-	-	-	-	-	-	-	-	-	-	-	-	1.22506	0.00070207	3.84224
506	86.25	601.4	C15H15FN4O	4-(2-fluorophenyl)-1,3,8-trimethyl-1H,6H,7H,8H-pyrazolo[3,4-e][1,4]diazepin-7-one	Organic acids and derivatives	Carboxylic acids and derivatives	Amino acids, peptides, and analogues	1.09491	1.93442e-05	-8.65322	-	-	-	-	-	-	-	-	-	-	-	-	-	-	-	1.01231	6.48414e-05	5.78943	-	-	-
508	90.18	428.1	C19H29NO5	2-[(2,2-dimethylpropanoyl)oxy]-5-[1-hydroxy-2-(methylamino)ethyl]phenyl 2,2-dimethylpropanoate	Benzenoids	Phenols	Phenol esters	-	-	-	-	-	-	-	-	-	1.3781	1.17871e-06	-12.0448	1.27307	1.71264e-05	-8.72789	1.3055	7.58378e-07	-7.12237	1.0062	5.79176e-05	5.49795	-	-	-
509	96.07	453.3	C35H71O9P	1-hexadecyl-2-tridecanoyl-glycero-3-phospho-(1'-sn-glycerol)	Lipids and lipid-like molecules	Glycerolipids	Glycerophosphoglycerols	-	-	-	1.35446	1.35512e-05	-6.87404	1.16401	0.00115023	-2.51468	-	-	-	-	-	-	-	-	-	-	-	-	-	-	-
510	<70	470.3						1.1632	1.7565e-05	11.6168	1.32683	1.27169e-05	8.47017	1.58218	0.000368592	4.34692	1.0191	3.43136e-05	6.42654	1.0192	9.52673e-05	6.35729	-	-	-	1.21188	3.43463e-05	8.91267	1.25382	6.17991e-05	7.1064
511	<70	394.1						1.38723	1.53173e-05	12.8468	1.00077	4.18254e-05	4.45421	-	-	-	-	-	-	-	-	-	-	-	-	1.04157	0.000277364	4.56626	-	-	-
512	97.21	424.1	C34H54O11	26-Glucosyl-1,3,11,22-tetrahydroxyergosta-5,24-dien-26-oate	Lipids and lipid-like molecules	Steroids and steroid derivatives	Bile acids, alcohols and derivatives	1.59166	1.17802e-05	16.6545	1.36661	1.2848e-05	9.38365	1.60975	0.00206244	2.13527	-	-	-	-	-	-	-	-	-	1.08042	0.000295192	4.61956	1.20826	0.000134333	5.64038
516	86.9	241.28						-	-	-	1.86234	4.19857e-06	22.3569	1.2333	6.48251e-05	8.28702	1.27056	2.04448e-06	17.4431	1.53271	4.97056e-06	20.247	1.2356	2.07457e-06	8.28702	1.17097	4.33829e-05	8.53936	1.59453	5.04969e-06	16.9375
517	96.5	230.2	C21H29FO3	6alpha-Fluoro-17beta-hydroxyandrost-4-en-3-one acetate	Lipids and lipid-like molecules	Steroids and steroid derivatives	Steroid esters	-	-	-	-	-	-	-	-	-	1.25664	3.56868e-05	5.85989	1.16259	6.6279e-05	6.76464	1.13068	1.05276e-05	4.15122	1.03079	0.000418559	3.55558	1.07885	0.000279092	3.74812
519	98.49	357.3	C15H30N4O5	L-Lysyl-L-seryl-L-isoleucine	Organic acids and derivatives	Amino acids and peptides	Tripeptides	1.19728	1.9207e-05	14.2679	-	-	-	1.31912	0.00078971	3.63946	-	-	-	-	-	-	-	-	-	1.0301	0.000117368	7.18109	-	-	-
522	<70	138						-	-	-	1.03085	4.00066e-05	-4.25224	-	-	-	-	-	-	-	-	-	-	-	-	-	-	-	-	-	-
523	97.84	261.2	C15H26O6	1,3-bis(butanoyloxy)propan-2-yl butanoate	Lipids and lipid-like molecules	Glycerolipids	Triradylcglycerols	-	-	-	1.14101	2.69305e-05	5.53266	1.30381	0.00207409	2.02906	-	-	-	-	-	-	-	-	-	-	-	-	-	-	-
525	97.76	312.2	C14H26N4O5	L-Glutaminyl-L-isoleucyl-L-alanine	Organic acids and derivatives	Amino acids and peptides	Tripeptides	-	-	-	1.37484	1.69741e-05	12.4184	-	-	-	-	-	-	-	-	-	-	-	-	-	-	-	-	-	-
526	86.18	298.2	C13H24N4O5	L-Leucyl-L-asparaginyl-L-alanine	Organic acids and derivatives	Amino acids and peptides	Tripeptides	-	-	-	-	-	-	-	-	-	1.13865	1.79273e-05	9.89918	1.15004	0.000102633	7.29552	1.06816	1.07041e-05	5.00196	-	-	-	-	-	-
527	93.49	361.2	C18H38NO5P	Sphing-4-enine-1-phosphate	Lipids and lipid-like molecules	Sphingoid bases	Sphingoid base 1-P	1.16516	1.57229e-05	-8.49563	-	-	-	-	-	-	-	-	-	-	-	-	-	-	-	-	-	-	-	-	-
529	97.99	312.5						1.12249	0.000173139	-4.12438	-	-	-	-	-	-	-	-	-	-	-	-	-	-	-	-	-	-	-	-	-
530	96.86	270.1	C11H20N4O5	L-Glutaminyl-L-alanyl-L-alanine	Organic acids and derivatives	Amino acids and peptides	Tripeptides	-	-	-	-	-	-	-	-	-	1.0037	9.48794e-05	-5.40564	1.00439	0.000356166	-4.47697	-	-	-	1.0926	0.00104909	3.00222	1.06001	0.000783842	-2.91773
533	98.07	312.2	C17H28O3S	4-undecylbenzene-1-sulfonic acid	Benzenoids	Benzenes	Benzenesulfonic acids	-	-	-	-	-	-	1.02793	0.000627388	6.47342	1.32311	2.91085e-05	16.7101	1.22142	0.000329112	7.30078	1.19132	1.93064e-05	6.47342	1.25191	0.00119427	3.82027	1.07431	0.00126904	2.72215
534	92.64	294.2	C6H13NOS	5-(methylsulfanyl)pentanal oxime	Organic nitrogen compounds	Organonitrogen compounds	Oximes	-	-	-	-	-	-	-	-	-	1.21595	1.78984e-05	10.6843	1.13231	0.000253365	5.17663	1.1491	1.29061e-05	4.9162	1.10233	0.000347563	4.80533	-	-	-
535	96.61	284.1	C12H22N4O5	Glycyl-L-asparaginyl-L-leucine	Organic acids and derivatives	Amino acids and peptides	Tripeptides	1.28005	9.56695e-06	-16.4379	1.30274	8.72213e-06	-11.3272	1.23239	0.000107243	-6.73825	1.23363	4.0216e-06	-13.6552	1.35824	7.29719e-06	-17.7463	1.07228	3.22475e-06	-6.73825	1.43532	4.3549e-06	16.1616	1.3249	1.08968e-05	-13.4093
537	97.17	362.1	C11H22N6O4S	Glycyl-L-cysteinyl-L-arginine	Organic acids and derivatives	Amino acids and peptides	Tripeptides	1.00643	0.000307668	-2.27568	-	-	-	-	-	-	-	-	-	-	-	-	1.07601	7.66942e-06	5.06087	-	-	-	-	-	-
538	97.15	298.2	C13H24N4O5	L-Glutaminyl-glycyl-L-isoleucine	Organic acids and derivatives	Amino acids and peptides	Tripeptides	1.56256	0.000111813	-6.68968	1.03501	0.000143156	-2.63634	-	-	-	-	-	-	-	-	-	-	-	-	-	-	-	-	-	-
539	91.95	298.37						-	-	-	-	-	-	0.99985	6.30468e-05	13.8826	1.49033	2.5601e-06	31.8626	1.40054	3.6824e-05	17.8628	1.42425	2.02652e-06	13.8826	1.32545	7.19114e-05	11.856	1.18777	0.000250972	6.46575
543	98.23	237.1	C8H17NO2S	2-amino-7-(methylsulfanyl)heptanoic acid	Organic acids and derivatives	Carboxylic acids and derivatives	Amino acids, peptides, and analogues	1.3178	3.45463e-06	-18.7986	-	-	-	1.11824	0.00113446	-2.37913	-	-	-	-	-	-	-	-	-	1.21372	3.08863e-05	7.57266	1.12706	5.69879e-05	-5.94923
545	99.59	237.11						1.525	3.90675e-06	-24.3939	1.46427	3.88765e-06	-22.6026	1.66426	2.60756e-06	-20.1178	1.65728	1.78034e-07	-36.825	1.45234	3.10778e-06	-24.8564	1.69537	1.04869e-07	-20.1178	1.80933	1.196e-07	38.0223	1.59824	1.41235e-06	-23.6281
546	94.11	361.2	C18H38NO5P	[2-(hexadecanoylamino)-2-hydroxyethyl]phosphonic acid	Organic acids and derivatives	Organic phosphonic acids and derivatives		-	-	-	1.05493	1.39427e-05	-8.17957	-	-	-	1.12036	1.27879e-05	-9.16319	1.21095	3.84566e-05	-9.10203	1.07283	4.95302e-06	-5.72119	1.06639	0.000219763	4.79219	-	-	-
547	98.42	208	C10H8O3S	naphthalene-1-sulfonic acid	Benzenoids	Naphthalenes	Naphthalenes	0.999479	2.55944e-05	-7.52846	-	-	-	-	-	-	-	-	-	-	-	-	-	-	-	1.00776	9.81454e-05	5.3041	-	-	-
549	94.03	645	C25H29I2NO3	(2-[4-[(2-butyl-1-benzofuran-3-yl)carbonyl]-2,6-diiodophenoxy]ethyl)diethylamine	Organo heterocyclic compounds	Benzofurans	Benzofurans	2.5798	7.34729e-09	-380.089	2.06386	7.13763e-07	-92.1676	2.71886	5.53585e-09	-184.801	2.82764	3.05283e-11	-567.305	2.50019	1.02892e-09	-444.633	2.66585	2.29186e-10	-184.801	2.76929	1.056e-10	356.023	2.38002	2.9165e-08	-156.588
550	98.67	389.3	C20H39NO6	(E,2S,3R,4R,5S,14R)-2-amino-3,4,5,14-tetrahydroxyicos-6-enoic acid	Lipids and lipid-like molecules	Fatty Acids and Conjugates	Fatty acids and conjugates	1.0812	1.54292e-05	-8.51771	1.00366	1.27317e-05	-6.25379	1.01209	0.000302843	-3.78359	-	-	-	1.19824	1.02298e-05	-10.119	-	-	-	1.0457	2.99491e-05	6.76059	1.19671	1.09436e-05	-8.97513
551	85.1	324.2	C6H14N2O3	(1R,2r,3S,4R,6S)-4,6-diaminocyclohexane-1,2,3-triol	Organic oxygen compounds	Organooxygen compounds	Alcohols and polyols	-	-	-	-	-	-	1.0129	4.1775e-05	12.3662	1.51543	1.36881e-06	28.3351	1.43371	2.05488e-05	17.38	1.44891	1.45378e-06	12.3662	1.34086	6.07303e-05	9.98265	1.17663	0.000134639	7.15341
555	99.04	316.2	C16H30O7	2-(6-hydroxy-2,6-dimethyloct-7-enoxy)-6-(hydroxymethyl)oxane-3,4,5-triol	Lipids and lipid-like molecules	Fatty Acids and Conjugates	Fatty acyl glycosides of mono- and disaccharides	1.09079	0.000272996	-2.96868	-	-	-	1.06162	0.00185491	2.4917	-	-	-	-	-	-	-	-	-	-	-	-	-	-	-
556	99.21	229.2	C11H23NO2	11-aminoundecanoic acid	Lipids and lipid-like molecules	Fatty Acids and Conjugates	Fatty acids and conjugates	-	-	-	1.05156	4.7883e-05	5.9609	-	-	-	1.27498	9.98057e-06	18.5193	1.27327	9.09299e-05	10.9051	1.20069	8.05789e-06	7.50125	1.16185	0.000174399	8.01652	1.0344	0.000376916	4.97808
557	83.19	168.98						1.46592	9.06226e-06	-18.7221	1.1187	2.00395e-05	-7.04888	1.51483	1.28886e-05	-14.4733	1.15961	7.50841e-06	-13.1113	-	-	-	1.49639	4.7902e-07	-14.4733	1.31854	2.74999e-05	11.3838	-	-	-
558	96.43	270.1	C11H20N4O5	L-Asparaginyl-glycyl-L-valine	Lipids and lipid-like molecules	Fatty Acids and Conjugates	Fatty acyl glycosides of mono- and disaccharides	1.14134	0.000216302	-3.26205	-	-	-	-	-	-	-	-	-	-	-	-	-	-	-	-	-	-	-	-	-
559	84.51	317.5						1.14092	1.57937e-05	-11.4992	1.2079	9.13425e-06	-9.98379	1.23031	3.55072e-05	-8.41606	1.42331	1.87757e-06	-15.4735	1.47533	4.08366e-06	-19.3469	1.21725	1.23255e-06	-8.41606	1.44949	3.9786e-06	14.6835	1.48755	3.41562e-06	-16.1312
565	97.39	610.3	C28H53O9P	1-(13Z,16Z-docosadienoyl)-glycero-3-phospho-(1'-sn-glycerol)	Lipids and lipid-like molecules	Glycerolipids	Monoacylglycerophosphoglycerols	1.02198	1.56416e-05	-5.50608	-	-	-	1.18754	0.000821298	-2.0451	-	-	-	-	-	-	-	-	-	-	-	-	-	-	-
567	99.92	310.2	C14H20N2O3	(2S)-2-[[(2S)-2-amino-3-phenylpropanoyl]amino]-3-methylbutanoic acid	Organic acids and derivatives	Carboxylic acids and derivatives	Amino acids, peptides, and analogues	1.15067	3.92514e-05	-9.20378	-	-	-	1.24109	2.64132e-06	-26.0752	1.70526	6.47167e-07	-32.939	1.83309	1.20642e-06	-47.9667	1.89164	1.06684e-07	-26.0752	1.41966	9.5373e-06	17.4866	1.42837	1.35666e-05	-16.561
568	94.27	280.2	C16H26O5	3-[(1R,2R,3R)-3-hydroxy-5-oxo-2-(3-oxooctyl)cyclopentyl]propanoic acid	Lipids and lipid-like molecules	Fatty Acyls	Eicosanoids	-	-	-	0.996365	3.26492e-05	5.52386	-	-	-	-	-	-	-	-	-	-	-	-	-	-	-	-	-	-
571	73.54	148.1						-	-	-	-	-	-	-	-	-	1.00803	6.76397e-05	8.07313	-	-	-	-	-	-	1.14856	0.000228565	7.38573	-	-	-
572	99.84	310.2	C14H20N2O3	N-(4-Aminobutyl)-3-(4-hydroxy-3-methoxyphenyl)acrylamide	Phenylpropanoids and polyketides	Cinnamic acids and derivatives		1.71087	1.47445e-06	-45.5701	1.46363	4.3087e-06	-20.5059	2.07081	9.78604e-07	-32.448	1.89647	7.14719e-08	-59.0511	1.89631	3.21932e-07	-65.6521	1.88083	4.05145e-08	-32.448	1.74468	2.47712e-07	43.7109	1.71396	9.6579e-07	-35.5327
573	99.14	344.2	C19H34O5	9S,11,15S-trihydroxy-2,3-dinor-thrombox-13E-en-1-oic acid	Lipids and lipid-like molecules	Fatty acids and conjugates	Eicosanoids	1.38106	1.2004e-06	-18.2679	-	-	-	-	-	-	-	-	-	-	-	-	-	-	-	1.11113	2.97248e-05	5.66234	1.16255	3.30506e-05	-5.20801
576	99.21	184	C7H8O2S	S-(furan-2-ylmethyl) ethanethioate	Organo heterocyclic compounds	Heteroaromatic compounds		1.08105	0.000103911	5.6896	-	-	-	-	-	-	1.58593	1.40673e-06	30.6171	1.28571	3.94573e-05	13.1489	1.09384	5.25483e-06	7.64039	1.37022	3.68398e-05	12.5186	-	-	-
579	99.87	209.1	C11H15NO3	6,7-dimethoxy-1,2,3,4-tetrahydroisoquinolin-8-ol	Organic nitrogen compounds	Alkaloids and derivatives	Isoquinoline alkaloids	1.45693	2.60793e-06	-18.5693	1.28688	4.6775e-06	-11.4862	1.51643	2.47415e-06	-14.876	1.71928	5.42076e-08	-34.1838	1.5954	4.59539e-07	-30.0214	1.56539	9.9662e-08	-14.876	1.6974	8.87208e-08	29.1804	1.64108	4.9333e-07	-23.1225
581	96.59	474.3	C23H40O7	2,3-dihydroxypropyl (Z)-7-[(1R,2R,3R,5S)-3,5-dihydroxy-2-[(E,3S)-3-hydroxyoct-1-enyl]cyclopentyl]hept-5-enoate	Lipids and lipid-like molecules	Fatty Acids and Conjugates	Eicosanoids	1.07732	0.000396919	-2.27493	-	-	-	-	-	-	1.1624	3.55934e-05	10.3978	1.1198	0.000401067	4.96855	1.12641	2.35731e-05	4.59939	1.21602	0.00138757	2.92018	1.05392	0.00146914	2.13362
587	98.12	848.56						2.18013	8.69151e-08	-135.986	1.64825	4.10904e-06	-34.0481	2.21575	1.86e-08	-97.226	2.53135	2.93641e-10	-255.605	2.09322	5.12195e-08	-149.871	2.37333	7.70046e-10	-97.226	2.37404	8.15617e-10	162.858	1.90948	4.13435e-07	-55.9916
591	87.46	172.1	C8H14O5	diethyl (2S)-2-hydroxybutanedioate	Organic acids and derivatives	Hydroxy acids and derivatives	Beta hydroxy acids and derivatives	1.20887	1.93972e-05	-11.1993	-	-	-	0.995279	0.000169985	-5.98876	1.17588	1.28496e-05	-9.8456	1.00022	8.42797e-05	-7.04294	1.0715	4.98896e-06	-5.98876	1.19991	2.76361e-05	10.3059	1.03257	8.15497e-05	-6.75298
593	99.88	256.1	C9H12N2O5	1-beta-D-ribofuranosylpyrimidin-2(1H)-one	Organo heterocyclic compounds	Pyrimidine nucleosides	Pyrimidine nucleosides	2.97424	2.49641e-12	-505.514	2.27517	6.02693e-08	-84.9467	3.02346	3.63077e-10	-118.709	2.89266	2.35395e-13	-399.96	2.59469	3.3692e-11	-281.566	2.72953	1.50315e-11	-118.709	3.02782	8.33041e-14	328.729	2.57974	6.6781e-10	-127.92
594	99.43	210.1	C8H18O4S	[(2-ethylhexyl)oxy]sulfonic acid	Organic acids and derivatives	Organic sulfuric acids and derivatives	Sulfuric acid esters	-	-	-	-	-	-	-	-	-	-	-	-	1.00231	6.22811e-05	-7.81085	1.20804	3.08535e-06	-6.85668	-	-	-	1.1798	5.68991e-05	-7.56604
595	71.45	315.2	C18H25N3O2	(1S,3S,5S)-2-[(2S)-2-amino-2-(3-hydroxy-1-adamantyl)acetyl]-2-azabicyclo[3.1.0]hexane-3-carbonitrile	Organic acids and derivatives	Carboxylic acids and derivatives	Amino acids, peptides, and analogues	1.12537	4.93486e-05	7.31321	-	-	-	-	-	-	1.50948	6.11259e-07	26.5896	1.36817	5.84646e-06	20.866	1.20387	1.8863e-06	8.77376	1.4575	6.11141e-06	16.2551	1.18452	4.47023e-05	8.99671
596	85.51	276.18						-	-	-	1.06598	3.33527e-05	5.88923	-	-	-	1.07057	3.38845e-05	8.17098	1.28022	5.40066e-05	10.2007	-	-	-	-	-	-	1.0165	0.000127907	6.56637
597	97.68	574.3	C12H21N3O5	L-Alanyl-L-prolyl-L-threonine	Organic acids and derivatives	Amino acids and peptides	Tripeptides	1.04485	3.46942e-05	-7.81806	1.39903	4.99875e-06	-14.7643	1.11838	0.000554753	-3.66537	1.0202	2.26793e-05	-7.37081	1.23985	1.98072e-05	-11.4857	-	-	-	1.17468	4.34716e-05	7.81581	1.26096	1.3677e-05	-11.6992
599	99.69	292.2	C17H26O5	methyl 8-[2-(2-formyl-vinyl)-3-hydroxy-5-oxo-cyclopentyl]-octanoate	Lipids and lipid-like molecules	Fatty Acids and Conjugates	Hydroxy fatty acids	1.5003	1.51295e-06	-19.0156	1.24662	4.78726e-06	-9.32883	1.30604	4.05349e-05	-6.34093	1.26462	1.69743e-06	-11.3686	1.37447	2.84374e-06	-14.8362	1.13167	1.41711e-06	-6.34093	1.50509	5.99073e-07	15.7481	1.47368	1.22201e-06	-14.8303
604	98.63	288.2	C16H32O4	3,12-dihydroxy-hexadecanoic acid	Lipids and lipid-like molecules	Fatty Acids and Conjugates	Hydroxy fatty acids	-	-	-	1.07048	3.2582e-05	6.75784	0.998879	3.1882e-05	13.8109	1.59348	7.98728e-07	35.8568	1.53911	1.34138e-05	21.3652	1.48034	1.136e-06	13.8109	1.31228	4.95778e-05	11.0622	1.16042	7.90171e-05	9.08284
605	80.68	483.96						1.63284	6.15293e-06	-31.1739	1.70506	3.82352e-06	-31.9389	1.76712	2.27219e-05	-15.316	1.64409	1.60232e-06	-28.4406	1.52071	9.27467e-06	-25.0797	1.59042	8.44883e-07	-15.316	1.64236	3.53147e-06	26.2905	1.88539	3.12675e-06	-29.3481
613	99.32	336.1	C15H10F6O2	4-[1,1,1,3,3,3-hexafluoro-2-(4-hydroxyphenyl)propan-2-yl]phenol	Benzenoids	Benzenoids	Diphenylmethanes	1.52077	1.70512e-06	-24.771	1.33235	4.77685e-06	-12.0605	1.61162	2.17841e-07	-29.4166	1.99752	6.94935e-09	-61.2395	1.84917	8.18738e-08	-55.8512	1.89596	9.01867e-09	-29.4166	1.81127	3.14969e-08	39.0939	1.71471	4.52753e-07	-28.0192
615	85.93	646.3	C34H48O9	(1R,4S,4'S,5'S,6R,6'R,8R,10E,12S,13S,14E,16E,20S,24S)-6'-butan-2-yl-4',12,24-trihydroxy-5',11,13,22-tetramethylspiro[3,7,19-trioxatetracyclo[15.6.1.14,8.020,24]pentacosa-10,14,16,22-tetraene-6,2'-oxane]-2,21-dione	Phenylpropanoids and polyketides	Macrolides and analogues	Avermectins	-	-	-	-	-	-	-	-	-	1.1045	2.56269e-05	6.83408	1.17667	6.68321e-05	7.03519	-	-	-	1.17748	0.000227629	4.49053	-	-	-
616	90.62	629	C14H26N3O17P3	[[(2R,3S,4R,5R)-5-(4-amino-2-oxopyrimidin-1-yl)-3,4-dihydroxyoxolan-2-yl]methoxy-hydroxyphosphoryl] [(2R,3S)-2,4-dihydroxy-3-methyl-3-phosphonooxybutyl] hydrogen phosphate	Organo heterocyclic compounds	Pyrimidine nucleosides	Pyrimidine ribonucleotides	2.33685	6.0742e-08	-163.717	1.68989	3.9544e-06	-33.0245	2.26609	2.06699e-07	-52.4745	2.23823	6.15827e-09	-130.905	1.87852	3.01465e-07	-81.1222	2.05047	8.55741e-09	-52.4745	2.31186	1.82028e-09	125.03	1.73306	1.2894e-06	-37.8427
623	99.93	344.3	C10H13NO4	(2S)-2-amino-3-(4-hydroxy-3-methoxy-phenyl)propionic acid	Organic acids and derivatives	Carboxylic acids and derivatives	Amino acids, peptides, and analogues	-	-	-	1.06196	1.55621e-05	-8.30013	1.05861	0.00092978	-3.11274	-	-	-	1.0682	6.77397e-05	-7.82994	-	-	-	1.04283	5.54005e-05	7.79363	1.06466	6.41229e-05	-7.39828
625	72.97	298.1	C20H12O4	cis-4-(8-Hydroxypyren-7-yl)-2-oxobut-3-enoate	Benzenoids	Benzenoids	Pyrenes	-	-	-	-	-	-	-	-	-	-	-	-	1.06396	0.0001685	-8.8209	1.03748	1.06045e-05	-7.12698	1.15178	0.000199183	8.40899	1.12557	0.000132551	-9.12838
637	99.36	168.1	C10H18O3	(6Z)-6-methyl-2-methylideneoct-6-ene-1,3,8-triol	Lipids and lipid-like molecules	Fatty alcohols	Fatty alcohols	1.3643	3.16664e-06	-13.5567	1.38683	3.69361e-06	-10.6892	1.62912	3.58948e-06	-10.9753	1.46716	4.17813e-07	-16.0063	1.42322	1.53614e-06	-17.2089	1.44639	1.45573e-07	-10.9753	1.62472	2.70274e-07	19.2094	1.78438	4.36819e-07	-18.9179
638	82.71	432	C20H28N10O19P4	[[(2R,3S,4R,5R)-5-(6-aminopurin-9-yl)-3,4-dihydroxyoxolan-2-yl]methoxy-hydroxyphosphoryl] [[[(2R,3S,4R,5R)-5-(6-aminopurin-9-yl)-3,4-dihydroxyoxolan-2-yl]methoxy-hydroxyphosphoryl]oxy-hydroxyphosphoryl] hydrogen phosphate				1.44143	5.79827e-06	-21.591	-	-	-	1.11016	0.000163275	-6.09151	1.37237	2.38958e-06	-16.3241	1.35971	7.32185e-06	-18.2045	-	-	-	1.57758	1.66566e-06	20.3356	1.17047	3.46214e-05	-9.50052
639	95.94	216.97						1.40087	0.000121272	4.11494	1.21874	4.50806e-05	4.19906	1.36524	0.000275903	5.02851	1.32497	3.57233e-05	6.64195	-	-	-	1.36609	8.06863e-06	5.02851	1.29834	0.000317	4.31647	1.71215	7.84158e-05	6.72497
640	99.11	264.32						1.42981	1.55696e-05	-13.3855	1.27702	1.39564e-05	-8.45892	1.48666	2.78786e-05	-10.042	1.52149	2.14498e-06	-16.5972	1.58146	4.5519e-06	-20.5675	1.33822	1.01118e-06	-10.042	1.53247	7.03895e-06	14.1709	1.34319	2.27551e-05	-10.7461
643	85.18	316.2	C20H30O4	8S-hydroxy-14-oxo-5Z,9E,12-prostatrienoic acid-cyclo[11S,15R]	Organic acids and derivatives	Hydroxy acids and derivatives	Medium-chain hydroxy acids and derivatives	1.49052	1.92892e-06	-23.3564	1.40801	4.63392e-06	-13.4907	1.74326	3.16466e-05	-8.06991	1.13204	7.44828e-06	-9.48796	1.36518	4.54073e-06	-16.3491	1.24684	1.12909e-06	-8.06991	1.54087	2.42382e-06	14.8073	1.5334	3.48177e-06	-14.1596
644	95.9	624.3	C32H50O13	(1R,4S,5R,9S,10R,13S)-13-[(2S,3R,4S,5S,6R)-4,5-dihydroxy-6-(hydroxymethyl)-3-[(2S,3R,4S,5S,6R)-3,4,5-trihydroxy-6-(hydroxymethyl)oxan-2-yl]oxyoxan-2-yl]oxy-5,9-dimethyl-14-methylidenetetracyclo[11.2.1.01,10.04,9]hexadecane-5-carboxylic acid	Lipids and lipid-like molecules	Prenol lipids	Terpene glycosides	1.14826	1.48202e-05	-9.97903	1.33549	5.07242e-06	-11.6226	1.42671	7.89416e-05	-5.86964	1.1943	4.35153e-06	-10.0165	1.3456	3.58068e-06	-16.0356	1.09901	2.44648e-06	-5.86964	1.41634	2.67029e-06	13.1188	1.56753	1.19969e-06	-16.3082
648	99.62	244.2	C14H28O3	6R-hydroxy-tetradecanoic acid	Lipids and lipid-like molecules	Fatty Acids and Conjugates	Hydroxy fatty acids	1.67497	1.75406e-06	-30.4078	2.07442	4.84741e-07	-52.5882	1.82016	1.28869e-06	-22.9354	1.73828	7.01035e-08	-44.1962	1.59828	1.07057e-06	-33.7602	1.79773	5.33522e-08	-22.9354	2.0404	6.92839e-08	42.8654	2.02387	1.80474e-07	-46.9229
650	<70	237.1						1.10759	3.06197e-05	6.96914	1.18928	2.01395e-05	5.31575	1.33446	0.000468082	3.31279	-	-	-	1.14822	5.73169e-05	5.84218	-	-	-	1.37744	2.99942e-05	6.44161	1.41206	6.11971e-05	5.2578
651	99.14	342.2	C17H28O2S	2-[(2E,6E)-3,7,11-trimethyldodeca-2,6,10-trienyl]sulfanylacetic acid	Lipids and lipid-like molecules	Prenol lipids	Sesquiterpenoids	-	-	-	1.00319	2.69965e-05	5.30416	-	-	-	1.44508	8.1921e-07	19.6572	1.35064	1.21556e-05	13.1507	1.31358	1.12551e-06	8.98632	1.10535	3.82584e-05	7.95732	1.07593	6.15312e-05	6.73481
652	97.95	316.3	C18H36O4	10,11-dihydroxy-octadecanoic acid	Lipids and lipid-like molecules	Fatty Acids and Conjugates	Octadecanoids	1.09912	3.74072e-05	-7.55414	-	-	-	-	-	-	-	-	-	-	-	-	-	-	-	-	-	-	-	-	-
654	86.55	308.31						1.00442	3.74081e-05	-6.08692	1.02689	1.57537e-05	-6.11683	-	-	-	1.00006	1.21141e-05	-7.46103	1.12289	2.40446e-05	-8.52152	-	-	-	1.10811	2.27183e-05	7.82125	1.10588	3.45574e-05	-7.02775
656	86.26	296.1	C13H20N2O4	4-Bis(2-hydroxyethyl)amino-L-phenylalanine	Organic acids and derivatives	Carboxylic acids and derivatives	Amino acids, peptides, and analogues	2.27953	1.06967e-08	-103.592	1.68994	1.942e-06	-25.1677	2.35258	4.92351e-08	-38.6641	2.12463	2.56335e-09	-74.1331	1.89797	9.62604e-08	-53.3694	2.12253	2.03834e-09	-38.6641	2.21011	7.23254e-10	74.2945	1.7659	3.73595e-07	-30.2411
657	88.6	338.2	C18H26O6	(4Z,7R,8E,10E,12Z,14S)-7,14-dihydroxyoctadeca-4,8,10,12-tetraenedioic acid	Lipids and lipid-like molecules	Fatty Acids and Conjugates	Fatty acids and conjugates	-	-	-	1.0752	6.44152e-06	-5.29799	-	-	-	1.46824	1.09794e-07	-14.6993	1.47047	3.14921e-07	-16.4113	1.45896	9.67424e-08	-9.18012	1.24585	2.66092e-06	8.56191	1.50394	6.98313e-07	-11.5367
658	99.16	330.3	C19H38O4	1-hexadecanoyl-sn-glycerol	Lipids and lipid-like molecules	Glycerolipids	Monoacylglycerols	-	-	-	1.03645	2.48353e-05	-6.74241	-	-	-	1.32268	7.19688e-06	-13.2535	-	-	-	1.70631	1.03723e-06	-11.1174	1.08137	9.99794e-05	6.94102	1.27851	6.68063e-05	-7.82536
660	99.81	272.2	C16H32O3	3R-hydroxyhexadecanoic acid	Lipids and lipid-like molecules	Fatty Acids and Conjugates	Hydroxy fatty acids	1.66071	3.64023e-07	-36.6099	1.83087	1.23811e-06	-26.3307	1.84438	3.15723e-06	-13.7886	1.35721	9.64794e-07	-15.6234	1.55155	1.56088e-06	-21.8666	1.49134	1.2774e-07	-13.7886	1.62508	3.2623e-07	21.1297	1.82725	4.18231e-07	-23.0667
663	99.05	326.2	C12H26O4S	dodecyl sulfate	Organic acids and derivatives	Organic sulfuric acids and derivatives	Sulfuric acid esters	1.01049	6.09191e-05	6.3655	-	-	-	1.0843	4.09296e-05	9.14952	1.42648	3.05372e-06	15.3024	1.45798	9.91514e-06	15.9016	1.32463	1.42694e-06	9.14952	1.3014	3.19414e-05	9.53513	1.16034	7.97488e-05	6.67237
664	99.45	504.2	C21H32O10	3-hydroxy-3-(hydroxymethyl)-9-methyl-6-methylidene-8-[3,4,5-trihydroxy-6-(hydroxymethyl)oxan-2-yl]oxy-4,5,6a,7,8,9,9a,9b-octahydro-3aH-azuleno[4,5-b]furan-2-one	Lipids and lipid-like molecules	Prenol lipids	Terpene lactones	-	-	-	1.24792	8.74528e-06	-8.80912	-	-	-	1.09558	6.45372e-06	-9.56816	1.22979	1.32936e-05	-10.9948	-	-	-	1.08818	3.8117e-05	7.2371	1.23733	1.79423e-05	-9.10796
666	72.24	360.1	C21H14O7	(2S)-2,3-Dihydro-5,9,10-trihydroxy-2-(4-hydroxyphenyl)-4H-benzofuro[2,3-h]-1-benzopyran-4-one	Phenylpropanoids and polyketides	Flavonoids	Flavones and Flavonols	1.35772	4.96808e-06	-25.5209	1.44391	4.81331e-06	-18.318	1.55735	3.30606e-06	-20.5422	1.66973	1.45967e-07	-43.4866	1.57401	2.24801e-06	-31.7209	1.64121	1.3402e-07	-20.5422	1.7319	3.43889e-07	34.1199	1.46196	2.97816e-06	-22.6839
667	98.4	300.26						-	-	-	-	-	-	1.03448	0.00119005	2.89858	-	-	-	1.01107	0.000135841	6.0999	-	-	-	-	-	-	-	-	-
668	72.04	193.16						1.66642	1.17934e-06	-31.0876	1.54446	3.91265e-06	-16.4086	1.6819	1.84492e-05	-9.54686	1.47143	4.73704e-07	-20.3685	1.5685	1.81611e-06	-22.8306	1.28116	6.92197e-07	-9.54686	1.70801	2.59948e-07	23.445	1.56686	2.22562e-06	-16.4103
669	90.35	454.2	C22H34O8	6,9,11,13,14-pentahydroxy-3,7,10-trimethyl-11-(propan-2-yl)-15-oxapentacyclo[7.5.1.0¹,⁶.0⁷,¹³.0¹⁰,¹⁴]pentadecan-2-yl acetate	Lipids and lipid-like molecules	Prenol lipids	Diterpenoids	1.64657	1.88381e-06	-16.7087	1.40973	3.77423e-06	-10.7194	1.31991	1.29937e-05	-7.88224	1.38838	6.95872e-07	-13.3495	1.39538	2.79419e-06	-14.0644	1.37821	4.81647e-07	-7.88224	1.65384	3.88701e-07	15.5161	1.6396	1.08244e-06	-14.0388
670	99.4	370.2	C16H32N6O5	L-Threonyl-L-leucyl-L-arginine	Organic acids and derivatives	Amino acids and peptides	Tripeptides	1.61153	1.50075e-06	-31.1204	1.29474	5.30441e-06	-12.9583	1.50831	4.67809e-08	-37.9264	1.92832	1.70673e-08	-53.3475	1.77611	2.53928e-07	-44.9509	2.16004	1.93674e-09	-37.9264	2.096	4.95662e-09	52.3701	1.83317	3.25991e-07	-33.2201
674	87.45	169	C7H9NO5	1-(2-carboxyacetamido)cyclopropane-1-carboxylic acid	Organic acids and derivatives	Carboxylic acids and derivatives	Amino acids, peptides, and analogues	1.87351	1.32568e-07	-50.2621	1.50017	3.91378e-06	-16.4548	1.9207	5.25015e-08	-40.8644	2.22068	9.39636e-10	-88.5042	1.83024	9.03001e-08	-57.3057	2.12768	2.17358e-09	-40.8644	2.14969	1.64354e-09	64.2355	1.76057	3.73559e-07	-30.8554
675	98.35	330.2	C18H36O6	9,10,12,13-tetrahydroxy-octadecanoic acid	Lipids and lipid-like molecules	Fatty Acids and Conjugates	Octadecanoids	-	-	-	-	-	-	-	-	-	-	-	-	1.00281	0.000106163	5.83691	-	-	-	-	-	-	-	-	-
677	83.41	175	C4H8N3O4P	[(1-methyl-4-oxoimidazolidin-2-ylidene)amino]phosphonic acid	Organic acids and derivatives	Carboxylic acids and derivatives	Amino acids, peptides, and analogues	-	-	-	1.23119	1.2984e-05	-8.95371	-	-	-	-	-	-	-	-	-	-	-	-	-	-	-	1.52937	2.48204e-05	-11.2968
681	98.25	200	C3H10OS	1-(thiophen-2-yl)butan-1-one	Organic oxygen compounds	Organooxygen compounds	Carbonyl compounds	-	-	-	-	-	-	1.0286	5.85659e-05	-8.46413	1.1746	8.7124e-06	-11.5244	1.14831	2.41804e-05	-12.1153	1.24795	1.8791e-06	-8.46413	1.22969	2.995e-05	9.93385	1.17704	3.48236e-05	-9.63495
682	87.67	139	C6H7NO3	(2E,4Z)-2-amino-6-oxohexa-2,4-dienoic acid	Organic acids and derivatives	Carboxylic acids and derivatives	Amino acids, peptides, and analogues	2.13769	1.71257e-08	-71.4048	1.51653	4.14346e-06	-15.8194	2.07073	2.10393e-07	-25.1367	1.92598	7.67401e-09	-49.9213	1.78846	1.12229e-07	-43.8274	1.92055	8.71031e-09	-25.1367	2.25305	5.4652e-10	67.6919	1.80325	2.22585e-07	-31.7856
686	99.32	574.3	C28H50O10	4-(4,5-dihydroxy-4,6-dimethyloxan-2-yl)oxy-14-ethyl-6,7,12-trihydroxy-3,5,7,9,11,13-hexamethyl-oxacyclotetradecane-2,10-dione	Phenylpropanoids and polyketides	Macrolides and analogues	Macrolides	1.10289	1.5547e-05	-7.03837	-	-	-	-	-	-	-	-	-	-	-	-	-	-	-	1.07503	5.18342e-05	4.93616	1.08862	3.88699e-05	-5.19814
696	94.06	349.2	C19H31NO3	N-[(4-hydroxy-3-methoxyphenyl)methyl]-9-methyldeca...	Benzenoids	Phenols	Methoxyphenols	-	-	-	-	-	-	-	-	-	1.27826	7.2829e-06	12.4862	1.26282	6.78372e-05	8.04779	1.17453	6.27218e-06	5.78156	1.20181	0.000190071	5.44077	1.01272	0.000479429	3.36516
699	99.45	444.48						1.29485	1.55559e-05	-15.8923	1.37881	9.845e-06	-12.8967	1.52919	0.000589716	-4.13074	-	-	-	1.13424	5.16719e-05	-9.94106	-	-	-	1.23019	4.34046e-05	9.91981	1.29826	2.92066e-05	-11.6586
702	86.25	187.9	141.939	Methyl iodide	Organohalogen compounds	Alkyl halides	Halomethanes	-	-	-	1.37985	8.65661e-06	-10.7332	-	-	-	-	-	-	-	-	-	-	-	-	1.16404	3.82022e-05	8.77081	1.09678	3.99082e-05	-8.56702
705	96.24	318.1	C13H23N2O3PS	(2-tert-butylpyrimidin-5-yl)oxy-ethoxy-propan-2-yloxy-sulfanylidene-lambda5-phosphane	Organic acids and derivatives	Organic thiophosphoric acids and derivatives	Thiophosphoric acid esters	1.15993	2.14172e-05	-8.18871	1.00094	1.55936e-05	-6.41737	1.09445	1.88718e-05	-9.03689	1.42714	5.28958e-07	-19.2181	1.24138	8.24664e-06	-13.1058	1.31728	7.10979e-07	-9.03689	1.45664	1.63881e-06	16.2943	1.35115	6.00626e-06	-12.5407
707	75.37	643.4						2.15073	9.36022e-08	-88.9458	1.59344	4.28004e-06	-23.6615	2.12385	8.71614e-08	-45.5974	2.33164	9.21373e-10	-128.286	1.95546	8.63998e-08	-80.8851	2.09021	3.6085e-09	-45.5974	2.29266	1.09284e-09	94.5651	1.82183	4.34976e-07	-36.967
708	98.34	356.2	C17H32N4O4	L-Lysyl-L-isoleucyl-L-proline	Organic acids and derivatives	Carboxylic acids and derivatives	Amino acids, peptides, and analogues	1.39413	4.12599e-06	-19.3187	1.6505	4.14923e-06	-19.665	1.68881	9.21521e-06	-12.1628	1.53819	4.46765e-07	-23.1723	1.50891	1.76819e-06	-24.2579	1.47324	3.53866e-07	-12.1628	1.82084	1.67265e-07	29.2446	1.84058	4.30655e-07	-28.6378
709	99.88	358.3	C21H42O4	[(2S)-1-hexadecoxy-3-hydroxypropan-2-yl] acetate	Lipids and lipid-like molecules	Glycerolipids	Diradylglycerols	-	-	-	-	-	-	-	-	-	-	-	-	1.26388	8.31147e-06	-14.4809	-	-	-	1.05276	4.23135e-05	7.35696	1.34804	1.44319e-05	-10.8063
710	98.63	318.2	C8H12N2	2,3-diethylpyrazine	Organo heterocyclic compounds	Diazines	Pyrazines	1.40607	2.24827e-06	-18.1882	1.18607	1.1404e-05	-6.76428	1.45127	0.000523397	-3.10057	-	-	-	-	-	-	-	-	-	1.12349	2.60459e-05	7.28976	1.20266	3.31682e-05	-6.70878
713	84.49	296.1	C19H22O4	(1R,2R,5R,8R,9S,10R,11R)-11-methyl-6-methylidene-16-oxo-15-oxapentacyclo[9.3.2.15,8.01,10.02,8]heptadec-13-ene-9-carboxylic acid	Lipids and lipid-like molecules	Prenol lipids	Diterpenoids	-	-	-	-	-	-	-	-	-	-	-	-	1.00092	6.66316e-05	-7.81032	-	-	-	1.13782	4.48028e-05	8.14161	-	-	-
716	77.87	224						-	-	-	1.31089	4.71019e-06	-10.8661	1.05016	1.21887e-07	-26.7394	1.7012	3.37879e-08	-34.4021	1.62242	8.76274e-07	-24.3992	1.97613	5.04614e-09	-26.7394	1.2959	5.15489e-06	11.837	1.37543	3.48159e-06	-13.3713
719	79.94	256.1	C22H40O13	ethyl 3-[(2R,4S,5S)-3,4,5-trihydroxy-6-[[(2R,4S,5S)-3,4,5-trihydroxy-6-(hydroxymethyl)oxan-2-yl]oxymethyl]oxan-2-yl]oxyoctanoate	Lipids and lipid-like molecules	Fatty Acids and Conjugates	Fatty acyl glycosides of mono- and disaccharides	2.0722	8.21347e-08	-70.4093	1.5713	3.91715e-06	-19.8415	2.05803	3.66472e-07	-27.7254	2.06574	1.22161e-08	-59.5089	1.74534	4.53703e-07	-38.8704	1.82435	1.5172e-08	-27.7254	2.0583	7.84342e-09	53.3439	1.62532	7.97749e-07	-25.3611
720	94.08	586.3	C18H17N3O5	1,4,5-trihydroxy-6-[[2-(2-methylbut-3-en-2-yl)indo...	Organo heterocyclic compounds	Indoles	Alcohols and polyols	1.06865	1.5019e-05	-11.077	1.02195	1.79544e-05	-5.96889	1.29759	0.000818161	-2.91791	-	-	-	-	-	-	-	-	-	-	-	-	-	-	-
721	76.99	224	C12H24N6O4S2	L-Arginyl-L-cysteinyl-L-cysteine	Organic acids and derivatives	Carboxylic acids and derivatives	Amino acids, peptides, and analogues	1.15646	1.54401e-05	-10.5036	1.46379	4.02819e-06	-16.8011	1.58688	4.61277e-08	-34.7217	1.82467	2.2276e-08	-45.1499	1.70224	4.40926e-07	-34.6866	2.09144	1.9097e-09	-34.7217	1.56867	4.59485e-07	22.5542	1.55846	1.28136e-06	-20.1558
722	99.95	258.2	C15H30O3	(2R)-2-hydroxypentadecanoic acid	Lipids and lipid-like molecules	Fatty Acids and Conjugates	Hydroxy fatty acids	1.45405	3.82259e-06	-20.6249	1.55195	4.13372e-06	-21.3512	1.61005	4.76214e-07	-24.0906	1.56055	2.37536e-07	-28.1622	1.77732	5.14826e-07	-35.7228	1.80839	1.97154e-08	-24.0906	1.69153	2.57127e-07	27.5312	1.80233	3.86624e-07	-30.5393
723	99.2	327.5						1.24739	9.27245e-06	-12.4411	1.27976	4.90914e-06	-11.7463	1.29113	1.11214e-05	-10.1421	1.27863	2.01744e-06	-13.0029	1.43005	2.84903e-06	-17.8909	1.38538	4.24079e-07	-10.1421	1.43593	2.37545e-06	14.8541	1.49109	1.24896e-06	-17.9478
724	95.85	295.1	C14H21NO4	isopropyl N-(3,4-diethoxyphenyl)carbamate	Benzenoids	Benzene and substituted derivatives	Phenylcarbamic acid esters	1.06509	0.000124234	3.54841	1.10064	2.7123e-05	4.69057	1.06038	0.000429197	3.49032	1.09734	2.85888e-05	5.5216	1.19016	8.0212e-05	5.49603	-	-	-	-	-	-	1.19907	0.000147134	4.21067
728	98.66	486.21						1.87539	1.76093e-06	-42.8896	1.75049	3.78532e-06	-28.1345	2.15883	2.19116e-06	-25.9504	2.00692	2.48382e-07	-41.1299	1.7775	1.31983e-06	-42.3449	2.04434	9.07144e-08	-25.9504	2.05264	4.5096e-07	35.0418	2.29435	4.08377e-07	-43.0442
730	98.97	226	CH3C6H2OH(NO2)2	2-methyl-4,6-dinitrophenol	Benzenoids	Phenols	Nitrophenols	1.64747	1.17531e-06	-33.7907	1.45618	3.73362e-06	-18.3523	1.73944	9.80766e-07	-20.2195	1.73015	5.17665e-08	-39.3148	1.54159	1.77031e-06	-24.839	1.6956	4.0604e-08	-20.2195	1.89856	2.60612e-08	36.5721	1.44867	3.41664e-06	-16.0201
733	95.4	446.3	C27H44O6	(2S,3R,5R,9R,10R,13R,14S,17R)-17-[(2S,3S)-3,6-dihydroxy-6-methylheptan-2-yl]-2,3,14-trihydroxy-10,13-dimethyl-2,3,4,5,9,11,12,15,16,17-decahydro-1H-cyclopenta[a]phenanthren-6-one	Lipids and lipid-like molecules	Steroids and steroid derivatives	Bile acids, alcohols and derivatives	-	-	-	1.27765	6.85942e-06	-10.3529	1.17791	0.000196647	-4.85105	1.14557	5.61545e-06	-10.2561	1.4388	4.53218e-06	-16.3033	-	-	-	1.28186	9.82106e-06	10.6324	1.30759	7.55491e-06	-11.8316
734	99.47	398.26						1.07684	1.91268e-05	-8.37686	1.08903	8.79398e-06	-8.48158	1.28295	4.71288e-06	-11.3287	1.46852	3.74588e-07	-18.7799	1.58882	1.50801e-06	-20.1745	1.49247	1.84275e-07	-11.3287	1.48502	5.46469e-07	16.8341	1.49844	1.91859e-06	-14.5863
736	99.47	310.2	C18H32O5	11-hydroperoxy-12,13-epoxy-9-octadecenoic acid	Lipids and lipid-like molecules	Fatty Acids and Conjugates	Epoxy fatty acids	1.155	2.77965e-05	-11.2208	1.28974	1.12447e-05	-11.9053	1.38355	1.2104e-05	-16.1356	1.37169	1.96061e-06	-22.2082	1.73036	1.18138e-06	-45.9841	1.59632	4.50363e-07	-16.1356	1.45287	3.93474e-06	21.6909	1.85975	1.04619e-06	-34.0182
739	87.65	626.3	C32H52O13	(2E,6E,10E)-14-[[4,5-dihydroxy-6-(hydroxymethyl)-3-[[3,4,5-trihydroxy-6-(hydroxymethyl)oxan-2-yl]oxy]oxan-2-yl]oxy]-2,6,10,14-tetramethylhexadeca-2,6,10,15-tetraenoic acid	Lipids and lipid-like molecules	Fatty Acids and Conjugates	Fatty acyl glycosides	1.14471	1.50538e-05	-9.28964	1.17693	1.14777e-05	-6.98013	1.27306	0.00122566	-2.29877	-	-	-	-	-	-	-	-	-	1.05865	3.06474e-05	6.92222	1.08238	3.94017e-05	-6.46343
740	81.42	360.37						1.45669	3.10066e-06	-25.1952	1.63428	3.89371e-06	-26.0085	1.70443	6.08511e-07	-24.495	1.91232	1.722e-08	-56.5654	1.80525	4.13391e-07	-42.5467	1.79435	2.51925e-08	-24.495	1.91781	1.86221e-08	44.6598	1.63949	8.44409e-07	-25.9746
741	94.43	312.14						-	-	-	1.03159	2.69781e-05	5.33306	-	-	-	1.36374	2.0272e-06	15.5033	1.2413	3.46914e-05	9.04127	1.30311	1.13705e-06	9.02357	1.02373	8.97435e-05	6.01613	-	-	-
742	99.68	418.2	C24H34O6	4-[(2S,3S)-3-[(3,4-dimethoxyphenyl)methyl]-4-methoxy-2-(methoxymethyl)butyl]-1,2-dimethoxybenzene	Lignans, neolignans and related compounds	Dibenzylbutane lignans		1.01003	3.43751e-05	-8.02766	1.18184	1.14424e-05	-9.33727	1.03427	0.00111156	-2.81142	-	-	-	1.13688	3.59746e-05	-9.35561	-	-	-	1.10299	6.45741e-05	6.93679	1.15383	3.50578e-05	-8.65842
745	99.77	431.13						1.45893	5.28488e-06	-14.0805	1.59197	3.58528e-06	-13.0617	1.4832	0.000257796	-4.072	-	-	-	0.997048	3.23027e-05	-7.40059	-	-	-	1.07224	3.36549e-05	6.72044	1.15478	2.59456e-05	-7.37989
747	85.27	314.2	C16H30O4	9-hydroxy-16-oxo-hexadecanoic acid	Lipids and lipid-like molecules	Fatty Acids and Conjugates	Dicarboxylic acids	2.0031	2.52839e-07	-40.4321	1.69721	3.17112e-06	-21.2869	2.06373	7.05905e-06	-11.6774	1.50226	4.40918e-07	-19.8879	1.36261	4.04211e-06	-16.7678	1.43878	2.69415e-07	-11.6774	1.82096	7.08728e-08	27.3729	1.78808	6.30894e-07	-21.1437
748	98.82	415.3	C22H43NO3	(2S,3S,8E)-2-amino-5,9,13,17-tetramethyloctadeca-8...	Lipids and lipid-like molecules	Prenol lipids	Diterpenoids	1.05702	2.26406e-05	-7.62649	1.22095	7.62201e-06	-9.11367	1.18269	4.04634e-06	-11.3451	1.22987	3.87658e-06	-10.0638	1.49028	2.68363e-06	-16.6601	1.5049	1.64169e-07	-11.3451	1.34866	5.27307e-06	10.7582	1.56265	2.30358e-06	-13.4314
750	77.43	374.05						1.26114	9.78261e-06	-14.1858	1.42136	3.83092e-06	-16.7752	1.38401	3.13509e-06	-14.9806	1.65966	7.61046e-08	-33.1422	1.67748	8.42684e-07	-30.077	1.56812	1.26775e-07	-14.9806	1.67613	1.62656e-07	26.0659	1.53926	1.38266e-06	-18.9137
751	85.36	228	C4H6N2S	1-methyl-2,3-dihydro-1H-imidazole-2-thione	Organo heterocyclic compounds	Azolines	Imidazolines	1.00208	0.000153836	3.27901	-	-	-	-	-	-	1.05089	3.3781e-05	5.36966	-	-	-	-	-	-	1.02314	0.000335866	3.5828	-	-	-
752	93.79	308.2	C18H30O5	5-[(1R,2R,3S,5S)-3,5-dihydroxy-2-[(E,3S)-3-hydroxyoct-1-enyl]cyclopentyl]-4-oxopentanoic acid	Lipids and lipid-like molecules	Fatty Acids and Conjugates	Eicosanoids	1.015	0.000397007	-2.04842	-	-	-	-	-	-	1.07695	3.95556e-05	7.21525	1.0436	0.000419442	3.89434	1.0601	2.64884e-05	3.57871	1.15258	0.00151182	2.40679	-	-	-
754	86.84	298.1	C16H19NO6S	[(2S,3R,4R,5R,6S)-4,5-dihydroxy-2-[4-(isothiocyana...	Organic oxygen compounds	Organooxygen compounds	Carbohydrates and carbohydrate conjugates	1.91312	1.3702e-07	-64.4809	2.03463	3.14702e-07	-60.9031	2.19704	4.14396e-09	-65.6488	2.42263	1.34081e-10	-143.778	2.39862	1.08367e-09	-150.318	2.45087	1.71561e-10	-65.6488	2.55441	8.48178e-11	109.774	2.36208	2.99985e-09	-85.9211
755	99.91	259.2	C13H25NO4	dibutyl (2S)-2-aminopentanedioate	Organic acids and derivatives	Carboxylic acids and derivatives	Amino acids, peptides, and analogues	1.46623	1.76831e-06	-17.2644	1.38943	3.84287e-06	-11.4531	1.42123	4.22542e-07	-16.5396	1.66304	5.57651e-08	-24.4263	1.73207	1.64083e-07	-28.6142	1.82654	1.74934e-08	-16.5396	1.75956	5.2349e-08	23.2828	1.75046	2.30194e-07	-22.0794
756	99.22	302.1	C16H16O7	3,5,6,10-tetramethoxy-8-oxatricyclo[7.4.0.0^[2,7]]...	Phenylpropanoids and polyketides	Tannins	Hydrolyzable tannins	1.61792	1.16462e-06	-30.8277	1.36643	3.80113e-06	-16.0165	1.77918	6.57438e-06	-12.8866	1.37045	2.03051e-06	-14.4309	1.57974	1.15836e-06	-27.0289	1.47254	2.50231e-07	-12.8866	1.57569	3.91021e-07	23.4468	1.84108	4.83769e-07	-26.9648
757	87.16	149.1	C10H16N6S	(Z)-1-cyano-2-methyl-3-(2-[[(5-methyl-1H-imidazol-...	Organo heterocyclic compounds	Azoles	Imidazoles	-	-	-	-	-	-	-	-	-	1.47901	5.32964e-07	22.9919	1.40773	6.84791e-06	16.5969	1.57092	2.18452e-07	14.673	1.1654	2.20547e-05	9.78341	1.14495	2.99521e-05	8.86993
758	99.72	224.1	C13H22O4	(3E)-4-(1,2,4-trihydroxy-2,6,6-trimethylcyclohexyl...	Lipids and lipid-like molecules	Prenol lipids	Sesquiterpenoids	1.49526	1.64481e-06	-25.0102	1.08257	1.26751e-05	-7.48966	1.38968	2.47232e-06	-15.5871	1.70963	5.57412e-08	-34.7611	1.51963	1.21362e-06	-24.9982	1.55217	9.93444e-08	-15.5871	1.87949	1.90016e-08	35.275	1.40083	3.46314e-06	-14.5704
760	87.54	188.1	C10H20O3	Hexyl (R)-3-hydroxybutyrate	Lipids and lipid-like molecules	Fatty Acids and Conjugates	Hydroxy fatty acids	1.65694	1.44482e-06	-28.5394	1.22688	9.04824e-06	-9.09299	1.42947	1.01873e-05	-11.2591	1.47236	4.42261e-07	-21.711	1.48926	1.48528e-06	-24.6513	1.425	3.8756e-07	-11.2591	1.63349	2.54744e-07	26.1127	1.56524	1.25858e-06	-20.256
763	79.41	300.1	C18H14N4O2	(2E,6E)-2,6-bis(2-phenylhydrazono)cyclohex-4-ene-1,3-dione	Benzenoids	Benzene and substituted derivatives	Phenylhydrazines	-	-	-	-	-	-	-	-	-	1.33205	2.49577e-06	16.3028	1.257	2.51205e-05	11.6212	1.30961	1.19666e-06	9.85746	-	-	-	-	-	-
764	99.81	373.3	C19H37NO3	N-hexadecanoyl-alanine	Lipids and lipid-like molecules	Fatty Acids and Conjugates	N-acyl amines	1.04269	4.01267e-05	-5.81937	1.18669	5.24768e-06	-10.5047	1.10747	1.7752e-05	-8.42253	1.24171	2.39812e-06	-11.4666	1.39709	3.60269e-06	-15.4479	1.29999	6.65311e-07	-8.42253	1.27191	8.68995e-06	9.92283	1.47956	2.57837e-06	-13.4806
766	95.9	398.2	C16H32N8O5	L-Lysyl-L-arginyl-L-asparagine	Organic acids and derivatives	Carboxylic acids and derivatives	Amino acids, peptides, and analogues	-	-	-	-	-	-	-	-	-	1.23485	7.34854e-06	-16.3644	1.1782	4.62609e-05	-12.0928	1.23118	3.48392e-06	-8.74527	-	-	-	-	-	-
767	95.79	385.01						-	-	-	1.09536	1.27727e-05	-7.5159	-	-	-	1.43073	5.28448e-07	-18.4614	1.52456	2.83713e-06	-18.5581	1.16166	2.15593e-06	-6.53435	1.23892	1.68627e-05	9.26184	1.12947	2.45753e-05	-8.67047
769	89.3	396.13						-	-	-	1.0765	3.54352e-05	4.61589	1.05391	0.00102332	2.78432	-	-	-	1.02066	0.000236177	4.26651	-	-	-	1.18905	0.000235679	4.3472	-	-	-
773	99.84	288.42						1.38103	1.62222e-05	-11.5889	1.41431	7.31277e-06	-12.0935	1.32786	1.68356e-05	-11.4485	1.33436	6.56286e-06	-11.3976	1.2001	2.06419e-05	-11.2831	1.6532	6.28065e-07	-11.4485	1.63388	6.12214e-06	14.6221	1.9968	2.17974e-06	-20.763
776	99.68	369.23						1.07437	0.000165711	3.71773	-	-	-	-	-	-	-	-	-	-	-	-	-	-	-	-	-	-	1.16406	0.000298629	4.21564
778	80.21	603.4	C30H51N7O7	N-[2-[[(2R,3R,4R,5R,6S)-2-(1,2-dihydroxyethyl)-4,5...	Organic acids and derivatives	Carboxylic acids and derivatives	Amino acids, peptides, and analogues	1.20825	1.22141e-05	8.58566	-	-	-	-	-	-	-	-	-	-	-	-	-	-	-	1.08445	2.15294e-05	6.12071	-	-	-
785	85.3	314.2	C16H30O4	16-hydroxy-10-oxohexadecanoic acid	Lipids and lipid-like molecules	Fatty Acids and Conjugates	Hydroxy fatty acids	1.58016	4.01016e-06	-17.0839	-	-	-	-	-	-	-	-	-	-	-	-	-	-	-	1.20773	8.53409e-05	5.31414	-	-	-
786	85.36	412.2	C22H36O7	[(1S,3R,4R,6S,8S,9R,10R,13R,14R,16R)-3,4,6,9,14-pentahydroxy-5,5,9,14-tetramethyl-16-tetracyclo[11.2.1.01,10.04,8]hexadecanyl] acetate	Lipids and lipid-like molecules	Prenol Lipids	Isoprenoids	-	-	-	1.42513	5.32939e-06	18.5123	1.07778	2.44034e-06	25.9372	1.94361	4.831e-08	70.8343	1.73695	2.18452e-06	35.7904	1.7155	9.844e-08	25.9372	1.43582	6.15649e-06	19.299	1.49531	7.00513e-06	19.8208
787	93.8	438.3	C24H42O5	propan-2-yl (Z)-7-[(1R,2R,3R,5S)-3,5-dihydroxy-2-[(E,3S)-3-hydroxy-3-methyloct-1-enyl]cyclopentyl]hept-5-enoate	Lipids and lipid-like molecules	Fatty Acids and Conjugates	Eicosanoids	-	-	-	-	-	-	-	-	-	-	-	-	1.06953	3.94424e-05	-7.08799	-	-	-	-	-	-	1.04399	4.50776e-05	-6.35157
788	92.93	379.93						-	-	-	-	-	-	-	-	-	-	-	-	1.05455	3.9603e-05	8.45536	1.42659	2.06671e-06	7.01639	-	-	-	1.43829	2.77437e-05	8.86824
790	85.59	238.1	C10H16N4O2S	3-(5-tert-butyl-1,3,4-thiadiazol-2-yl)-4-hydroxy-1-methylimidazolidin-2-one	Organic acids and derivatives	Amides	N-acylurea	1.01229	4.06117e-05	-6.49314	1.45147	5.09327e-06	-12.6596	1.15972	1.0196e-05	-10.34	1.50239	2.79692e-07	-21.8188	1.44635	3.81495e-06	-16.9073	1.35246	3.86939e-07	-10.34	1.50951	1.71351e-06	15.2786	1.39427	3.82149e-06	-13.2317
793	86.46	225.1	C10H11NO5	2-hydroxy-4,7-dimethoxy-1,4-benzoxazin-3-one	Organo heterocyclic compounds	Benzoxazines	Benzoxazinones	-	-	-	1.0567	1.14729e-05	-7.003	1.06622	3.14999e-05	-6.84959	1.24867	2.55745e-06	-10.4498	1.18633	1.25346e-05	-9.72877	1.19559	1.12577e-06	-6.84959	1.28779	6.0964e-06	9.66104	1.24956	1.0217e-05	-9.03782
794	87.73	129	C6H11NO5	(2S,4S)-4-amino-2-hydroxy-2-methyl-pentanedioic ac...	Organic acids and derivatives	Carboxylic acids and derivatives	Amino acids, peptides, and analogues	1.10196	3.46191e-05	10.226	1.17581	1.33621e-05	10.1604	1.47592	5.42446e-06	17.8678	1.56197	4.19932e-07	30.558	1.5599	5.72016e-06	22.5269	1.5971	2.08814e-07	17.8678	1.25211	1.0259e-05	15.2226	1.03793	6.21207e-05	8.32846
795	83.7	300	C8H6OS	2-(thiophen-2-yl)furan	Organo heterocyclic compounds	Heteroaromatic compounds	Heteroaromatic compounds	1.21516	9.95719e-06	-13.8543	1.37982	4.2624e-06	-15.1436	1.31609	5.02289e-07	-24.8867	1.87934	1.98401e-08	-50.4377	1.8631	2.37609e-07	-44.0476	1.78181	2.07949e-08	-24.8867	1.85249	6.99754e-08	36.1852	1.79286	4.16731e-07	-30.7082
797	<70	453.9						1.1388	0.000213601	-3.41772	-	-	-	-	-	-	-	-	-	-	-	-	-	-	-	-	-	-	-	-	-
799	87.58	164.2						1.08915	2.13942e-05	-8.35575	1.30261	4.83615e-06	-12.3651	1.26671	0.000210055	-4.66683	1.19556	8.01531e-06	-8.83524	1.34257	9.58889e-06	-12.2505	1.03608	6.12696e-06	-4.66683	1.35665	1.03508e-05	9.90908	1.26959	1.09401e-05	-10.3847
801	98.85	472.3	C16H32N10O5	L-Asparaginyl-L-arginyl-L-arginine	Organic acids and derivatives	Carboxylic acids and derivatives	Amino acids, peptides, and analogues	-	-	-	1.0167	1.5531e-05	-5.4288	-	-	-	-	-	-	1.17567	1.33492e-05	-8.69467	-	-	-	0.999279	5.21367e-05	5.31267	1.06924	3.33999e-05	-6.18285
803	73.25	663.85						1.34758	5.69208e-06	-13.0779	1.33634	4.88544e-06	-10.0971	1.17405	5.11157e-05	-6.47562	1.35109	8.1958e-07	-15.2899	1.33006	4.57762e-06	-13.9134	1.06507	1.73675e-06	-6.47562	1.73267	4.19622e-07	20.2553	1.62502	1.20405e-06	-17.2313
806	97.44	340.2	C15H26N4O6	L-Aspartyl-L-lysyl-L-proline	Organic acids and derivatives	Carboxylic acids and derivatives	Amino acids, peptides, and analogues	1.38935	5.20143e-06	-12.2275	1.02052	1.14215e-05	-6.25749	1.13887	2.5599e-05	-6.86609	1.30916	1.16054e-06	-12.0475	1.30845	2.78247e-06	-14.3192	1.18552	9.4419e-07	-6.86609	1.44452	1.00233e-06	13.8248	1.49406	2.2553e-06	-12.3366
808	84.88	382.2	C14H22N6O5	L-Alanyl-L-glutaminyl-L-histidine	Organic acids and derivatives	Carboxylic acids and derivatives	Amino acids, peptides, and analogues	1.10673	1.58269e-05	-9.20801	1.14805	8.39885e-06	-8.66973	1.3183	4.94445e-07	-21.0227	1.67372	5.53999e-08	-34.233	1.48881	1.57842e-06	-21.7467	1.79608	2.04701e-08	-21.0227	1.49326	4.7503e-07	21.1059	1.43355	2.29625e-06	-15.4403
811	99.73	401.3	C21H41NO3	N-hexadecanoyl-valine	Lipids and lipid-like molecules	Fatty Acids and Conjugates	N-acyl amines	1.19091	1.43548e-05	-10.1368	1.17957	7.62809e-06	-9.24904	-	-	-	1.57982	1.85535e-07	-22.6792	1.7574	2.46314e-07	-33.145	1.82717	1.66303e-08	-18.7723	1.57298	3.30963e-07	19.4395	1.6506	6.71745e-07	-18.9866
813	75.63	799.82						1.14492	3.06998e-05	-7.99219	1.21867	1.15041e-05	-8.60662	-	-	-	1.07129	1.27271e-05	-8.90726	1.05337	3.83112e-05	-8.7773	-	-	-	1.36477	1.92074e-05	10.476	1.29645	2.03485e-05	-10.4413
815	79.99	351.9	C9H7IO4	3-Iodo-4-hydroxyphenylpyruvate	Benzenoids	Benzene and substituted derivatives	Phenylpyruvic acid derivatives	1.30778	5.84131e-06	-16.3799	1.18903	7.64469e-06	-10.6791	1.33917	5.31444e-06	-12.5174	1.54622	1.8201e-07	-25.0976	1.40913	5.71834e-06	-15.5778	1.45836	2.04303e-07	-12.5174	1.58863	3.82043e-07	20.1725	1.22333	1.90153e-05	-9.52659
816	99.89	402.1	C20H20O10	5,7-dihydroxy-2-(3-hydroxy-4,5-dimethoxyphenyl)-3,6,8-trimethoxychromen-4-one	Phenylpropanoids and polyketides	Flavonoids	O-methylated flavonoids	1.3707	6.8142e-05	4.55874	-	-	-	-	-	-	1.20207	1.53239e-05	7.06864	1.054	6.32801e-05	6.22934	1.31121	5.00941e-06	4.88464	1.41591	7.15561e-05	5.61598	1.08755	0.000150253	4.33485
817	99.75	401.3	C21H41NO3	(2S)-2-(octadecanoylamino)propanoic acid	Organic acids and derivatives	Carboxylic acids and derivatives	Amino acids, peptides, and analogues	-	-	-	1.17764	9.5327e-06	-8.6462	1.17145	3.16148e-06	-13.0077	1.35247	1.10107e-06	-14.9827	1.68897	1.06995e-06	-23.5016	1.58484	1.27978e-07	-13.0077	1.38069	3.35246e-06	12.7524	1.50212	2.06267e-06	-14.9801
818	71.08	311.9						1.10004	1.83148e-05	13.7436	-	-	-	1.15252	8.64151e-05	7.83825	-	-	-	-	-	-	1.23795	2.62885e-06	7.83825	1.11032	3.94778e-05	9.58917	1.04178	0.000163351	5.42435
820	73.61	867.8						0.9963	3.89243e-05	-7.58603	-	-	-	-	-	-	1.01008	2.11168e-05	-7.86578	-	-	-	-	-	-	1.27073	2.16497e-05	10.5641	-	-	-
821	90.93	317.2	C23H27N	[(4-tert-butylphenyl)methyl](methyl)(naphthalen-1-ylmethyl)amine	Benzenoids	Naphthalenes	Naphthalenes	-	-	-	-	-	-	-	-	-	1.02079	1.37154e-05	-7.37692	1.28374	1.43716e-05	-10.3233	-	-	-	1.17565	2.74273e-05	7.71877	1.14608	2.71787e-05	-7.76898
823	86.5	202.05						-	-	-	1.08266	5.95111e-05	-4.0907	-	-	-	-	-	-	-	-	-	-	-	-	-	-	-	-	-	-
824	<70	714.5						-	-	-	-	-	-	1.02702	3.20296e-05	8.42784	1.45617	5.63335e-07	19.8715	1.38455	1.14817e-05	12.6977	1.30913	1.13973e-06	8.42784	1.32201	1.1778e-05	10.8165	1.13386	5.05378e-05	7.05541
826	94.53	672.32						-	-	-	1.36153	4.72816e-06	-12.1984	1.09839	0.000150552	-5.18384	1.23924	2.17431e-06	-12.7045	1.33593	9.64684e-06	-12.3479	0.999524	4.43025e-06	-5.18384	1.30449	9.14672e-06	10.4901	1.23366	1.24158e-05	-10.0639
828	<70	460						-	-	-	-	-	-	1.05368	3.09124e-06	-14.6615	1.55774	1.46307e-07	-28.2722	1.47249	6.09662e-06	-16.0044	1.57396	1.25196e-07	-14.6615	1.39357	6.0187e-06	13.0022	1.1473	5.38531e-05	-7.07827
831	94.9	527.4	C32H49NO5	[(2S)-1-[(1R,4R,5S)-1,4-dimethyl-2,8-dioxabicyclo[3.2.1]octan-4-yl]-3-[(1S,2R,3S,7R,10S,13S,14R)-1-methyl-14-propan-2-yl-12-azapentacyclo[8.6.0.02,13.03,7.07,12]hexadecan-2-yl]-1-oxopropan-2-yl] acetate	Organic nitrogen compounds	Alkaloids and derivatives	Daphniphylline-type alkaloide	-	-	-	-	-	-	-	-	-	-	-	-	1.08322	0.000112352	6.33568	-	-	-	-	-	-	-	-	-
836	73.16	460	C24H14O11	(2R,3S)-2-(3,4-dihydroxyphenyl)-6-[(2R,3R,4R)-2-(3,4-dihydroxyphenyl)-3,7-dihydroxy-chroman-4-yl]-8-[(2S,3R,4R)-2-(3,4-dihydroxyphenyl)-3,7-dihydroxy-chroman-4-yl]chromane-3,5,7-triol	Phenylpropanoids and polyketides	Tannins		-	-	-	-	-	-	-	-	-	1.25226	2.018e-06	-12.6398	1.25623	2.21664e-05	-9.36654	1.21578	1.44898e-06	-7.04061	1.13023	3.42336e-05	7.30668	-	-	-
837	<70	319.1						1.497	1.4493e-06	-24.0664	1.31724	3.66683e-06	-14.2855	1.51456	3.47414e-07	-20.9682	1.76926	1.16891e-07	-26.6862	1.74437	2.49805e-07	-35.3319	1.84462	1.4383e-08	-20.9682	1.71378	6.89268e-08	26.5615	1.84846	2.94987e-07	-26.464
838	97.75	741.5	C40H74NO10P	1-(11Z,14Z-eicosadienoyl)-2-tetradecanoyl-glycero-3-phosphoserine	Lipids and lipid-like molecules	Glycerolipids	Glycerophosphocholines	-	-	-	-	-	-	-	-	-	1.23	4.33125e-06	12.3347	1.09243	0.000167066	4.87871	1.06785	7.56348e-06	4.81335	1.10181	0.000142195	5.25031	-	-	-
840	79.43	224	C6H12N2O3S2	(2R)-2-[[(2R)-2-amino-3-sulfanylpropanoyl]amino]-3-sulfanylpropanoic acid	Organic acids and derivatives	Carboxylic acids and derivatives	Amino acids, peptides, and analogues	1.00006	4.32978e-05	-7.88922	-	-	-	1.04569	0.000100018	-7.44524	-	-	-	-	-	-	1.10434	3.04403e-06	-7.44524	1.23747	2.23868e-05	11.3117	-	-	-
842	70.6	324.2	C18H30N2O2	3-(dibutylamino)propyl 4-aminobenzoate	Benzenoids	Benzoic acids and derivatives	Benzoic acid esters	0.99945	0.000364242	2.19304	-	-	-	-	-	-	-	-	-	-	-	-	-	-	-	-	-	-	1.15283	0.000903944	2.5186
844	99.34	184	C7H8O2S	1-[(2-methylfuran-3-yl)sulfanyl]ethan-1-one	Organo heterocyclic compounds	Thioethers		-	-	-	-	-	-	-	-	-	1.41153	2.67238e-06	20.6897	1.37651	1.90703e-05	16.1285	1.27509	2.49948e-06	9.11467	1.13031	0.000137972	6.75668	1.02242	0.000131574	6.4633
845	83.96	166	C11H8N2O	2-(2-furyl)-1H-benzimidazole	Organo heterocyclic compounds	Benzimidazoles	Benzimidazoles	-	-	-	-	-	-	-	-	-	1.16546	5.37823e-06	-12.3528	-	-	-	1.03201	5.63542e-06	-5.50449	1.07353	4.14898e-05	8.3386	-	-	-
846	87.99	109.1	C6H10ClNO2	1,2,3,6-tetrahydropyridine-4-carboxylic acid;hydrochloride	Organo heterocyclic compounds	Pyrimidine nucleosides	Hydropyridines	1.23426	2.03453e-05	-11.6199	1.23481	1.28342e-05	-9.37464	1.48821	2.19184e-06	-23.1373	1.78895	7.15429e-08	-51.0896	1.62158	1.52968e-06	-36.0508	1.80419	9.07428e-08	-23.1373	1.67496	6.68555e-07	28.7157	1.42207	4.98163e-06	-18.715
847	70.46	533.04						1.42257	3.99624e-06	-18.8545	1.28046	5.3863e-06	-12.0837	1.43209	8.54314e-06	-11.4253	1.53474	1.80427e-07	-25.4274	1.55026	1.80377e-06	-22.1316	1.44414	3.26894e-07	-11.4253	1.64887	2.62028e-07	22.7487	1.35857	4.76198e-06	-13.5565
848	81.89	188.1	C8H9ClO4	[(3S)-5-oxooxolan-3-yl] (E)-4-chlorobut-2-enoate	Lipids and lipid-like molecules	Fatty Acids and Conjugates		-	-	-	-	-	-	-	-	-	-	-	-	1.19494	3.58484e-05	13.2862	1.46439	1.52625e-06	11.6488	-	-	-	-	-	-
849	84.57	172	C10H6O4	7-hydroxy-2-oxochromene-6-carbaldehyde	Phenylpropanoids and polyketides	Coumarins and derivatives		1.07176	5.68306e-05	7.39267	-	-	-	1.00152	0.000110027	7.44727	1.02861	3.4644e-05	7.46707	1.09766	6.16432e-05	8.90044	1.23816	3.28066e-06	7.44727	1.03184	0.000154635	6.13592	-	-	-
850	<70	386						-	-	-	-	-	-	1.05709	1.01771e-05	-11.4074	1.46682	5.66089e-07	-20.4713	1.06347	3.72915e-05	-8.35298	1.53566	3.86705e-07	-11.4074	1.12494	2.92209e-05	8.71449	-	-	-
851	84.01	200.1	C11H20O3	9-hydroxyundec-10-enoic acid	Lipids and lipid-like molecules	Fatty Acids and Conjugates		1.80564	3.90033e-07	-37.8891	1.88828	1.20276e-06	-28.879	2.00685	4.50637e-08	-34.0361	2.13148	3.5891e-09	-64.7231	2.17361	5.92632e-09	-82.3975	2.20132	1.86565e-09	-34.0361	2.32768	1.01218e-09	60.5905	2.3994	7.84961e-09	-56.0755
852	<70	689						1.08381	1.76005e-05	-8.00909	1.08137	1.09595e-05	-7.07358	1.14071	6.53463e-06	-9.47493	1.50421	1.3559e-07	-19.8922	1.46205	2.13324e-06	-15.7112	1.38339	2.49064e-07	-9.47493	1.46327	5.42546e-07	14.3383	1.24211	8.31522e-06	-9.38954
853	90.4	228	C8H8O6S	4-Formyl-2-methoxyphenyl hydrogen sulfate	Organic oxygen compounds	Aryl sulfate		-	-	-	-	-	-	1.05081	4.1739e-05	-6.65598	1.46414	2.86893e-07	-18.3905	1.29357	1.18871e-05	-10.5201	1.18996	1.45052e-06	-6.65598	1.41139	2.67129e-06	11.9574	1.08601	4.78322e-05	-6.23695
855	<70	460						-	-	-	-	-	-	-	-	-	1.31989	1.22764e-06	-15.6858	1.2825	2.53504e-05	-9.59103	1.27926	9.76356e-07	-8.42581	1.14073	5.17771e-05	6.82035	-	-	-
856	<70	448						1.01978	2.91882e-05	-8.62005	1.06657	1.62009e-05	-7.34445	1.22362	5.56594e-06	-13.8503	1.66454	6.82017e-08	-36.8959	1.47235	4.56559e-06	-18.9642	1.50427	2.14809e-07	-13.8503	1.5651	1.04298e-06	19.8582	1.17127	3.66396e-05	-8.48488
857	75.94	356.1	C17H12O7	Aflatoxin M4	Phenylpropanoids and polyketides	Coumarins and derivatives	Furanocoumarins	-	-	-	-	-	-	1.01215	2.53929e-06	-13.7628	1.66421	1.14045e-07	-25.5983	1.49126	4.17419e-06	-15.625	1.60883	1.02207e-07	-13.7628	1.16195	1.93288e-05	8.76497	1.0613	5.08625e-05	-6.44226
858	84.42	342.1	C12H22O11	(2R,3S,4S,5R)-2-[[(2S,3R,4R,5S)-3,4-dihydroxy-2,5-dimethylol-tetrahydrofuran-2-yl]oxymethyl]-5-methylol-tetrahydrofuran-2,3,4-triol	Organic oxygen compounds	Organooxygen compounds	Carbohydrates and carbohydrate conjugates	1.85781	2.19054e-06	31.6286	1.13711	2.36446e-05	6.33677	1.50399	0.000753555	3.4441	-	-	-	-	-	-	-	-	-	-	-	-	-	-	-
861	<70	478.1						-	-	-	-	-	-	-	-	-	1.35943	1.50288e-06	-15.0702	1.45693	4.59866e-06	-16.6443	1.2553	1.11359e-06	-8.20859	-	-	-	-	-	-
862	<70	325.2						-	-	-	-	-	-	-	-	-	1.04455	1.83115e-05	6.50189	1.12175	3.22477e-05	7.68041	-	-	-	-	-	-	-	-	-
863	73.82	613.07						2.13573	9.88072e-08	-79.4196	1.42716	4.75679e-06	-15.8261	2.08693	3.62262e-07	-30.4976	2.05209	7.04353e-09	-73.2331	1.66406	5.34283e-07	-40.467	1.86402	1.49977e-08	-30.4976	2.07839	8.1734e-09	59.5047	1.53721	2.27597e-06	-20.5284
864	96.89	410.2	C14H24N2O9	(2R)-2-[[(2R)-2-[(2S,3R,4R,5S,6R)-3-acetamido-2,5-dihydroxy-6-(hydroxymethyl)tetrahydropyran-4-yl]oxypropanoyl]amino]propanoic acid	Organic oxygen compounds	Organooxygen compounds	Carbohydrates and carbohydrate conjugates	-	-	-	1.10807	3.25666e-05	4.60169	-	-	-	-	-	-	-	-	-	-	-	-	-	-	-	1.27287	0.000402223	3.16749
865	99.88	296.1	C6H12O4	Isopentyl beta-D-glucoside	Lipids and lipid-like molecules	Fatty Acids and Conjugates	Fatty acyl glycosides	-	-	-	-	-	-	-	-	-	-	-	-	1.04274	4.46514e-05	-6.85876	-	-	-	1.06556	4.03642e-05	6.47168	-	-	-
866	70.09	696	C12H11ClN2O5S	4-chloro-2-[(furan-2-ylmethyl)amino]-5-sulfamoylbenzoic acid	Benzenoids	Benzenes	Benzenesulfonyl compounds	1.65458	9.05735e-06	-49.4674	1.18787	2.94806e-05	-10.1487	1.50063	1.29779e-05	-32.9146	1.93369	4.14687e-07	-97.2491	1.67246	4.26234e-06	-71.0347	1.686	4.81706e-07	-32.9146	1.65014	3.0117e-06	53.8855	1.40012	2.69675e-05	-25.1613
867	86.15	486.3	C28H42N2O3S	N-(2'-(4-benzenesulfonamide)-ethyl)-5Z,8Z,11Z,14Z-eicosatetraenoyl amine	Lipids and lipid-like molecules	Fatty Acids and Conjugates	N-acyl amines	1.04349	4.92156e-05	8.75287	1.23882	1.1437e-05	12.9004	1.25953	2.64798e-06	28.9368	1.83739	1.39007e-07	61.1003	1.81098	1.91978e-06	44.3775	1.7522	1.06886e-07	28.9368	1.56716	2.84864e-06	27.672	1.39311	1.26302e-05	18.4805
868	95.33	530.3	C27H46O10	2-[4,5-dihydroxy-6-(hydroxymethyl)-2-[(6E)-3,7,11-trimethyldodeca-1,6,10-trien-3-yl]oxyoxan-3-yl]oxy-6-methyloxane-3,4,5-triol	Lipids and lipid-like molecules	Fatty Acids and Conjugates	Fatty acyl glycosides	-	-	-	1.42543	4.18272e-06	23.0318	1.33728	1.5065e-06	29.6922	1.98314	2.11238e-08	82.4779	1.84292	1.1552e-06	46.1965	1.81498	6.23697e-08	29.6922	1.61426	1.15854e-06	29.8559	1.60947	3.31362e-06	24.1196
869	95.89	574.3	C28H48O9	(3S,4S,5R,6S,8S,9R,10R,13R,14R,15S,17R)-17-[(E,2R,5S)-6-hydroxy-5-(hydroxymethyl)-6-methylhept-3-en-2-yl]-10,13-dimethyl-1,2,3,4,6,7,9,11,12,15,16,17-dodecahydrocyclopenta[a]phenanthrene-3,4,5,6,8,14,15-heptol	Lipids and lipid-like molecules	Steroids and steroid derivatives	Ergostane steroids	-	-	-	1.47306	4.10941e-06	19.0526	1.17442	5.52657e-06	17.7615	1.72871	1.352e-07	43.4081	1.669	1.76897e-06	32.4816	1.55268	2.13022e-07	17.7615	1.43648	4.60274e-06	17.8914	1.43565	5.61346e-06	17.6602
870	92.7	260	C8H10N2O3S	(6R,7R)-7-amino-3-methyl-8-oxo-5-thia-1-azabicyclo[4.2.0]oct-2-ene-2-carboxylic acid	Organic acids and derivatives	Carboxylic acids and derivatives	Amino acids, peptides, and analogues	-	-	-	-	-	-	-	-	-	1.22223	1.07268e-05	-13.6392	1.08628	6.3156e-05	-9.93019	1.16929	4.0437e-06	-7.84879	1.02817	7.01211e-05	8.90039	-	-	-
871	78.44	517.94						1.43602	1.5103e-05	-22.5745	1.0601	4.2434e-05	-5.81607	1.31339	1.89291e-05	-18.5724	1.7342	7.17096e-07	-45.4485	1.51184	5.51759e-06	-37.0746	1.51748	7.13839e-07	-18.5724	1.45418	6.18201e-06	26.7537	1.32531	2.75283e-05	-16.5829
872	87.89	128.1	C7H14O3	2-Hydroxy enanthoic acid	Lipids and lipid-like molecules	Fatty Acids and Conjugates		-	-	-	1.50536	1.30236e-05	10.3972	1.11552	0.000335818	5.13403	-	-	-	-	-	-	1.1512	1.00284e-05	5.13403	-	-	-	-	-	-
874	94.36	916	C20H29N10O22P5	Diadenosine pentaphosphate	Organo heterocyclic compounds	Purines	Purines and purine derivatives	1.58564	1.00783e-05	-36.9542	1.06906	3.97874e-05	-7.23593	-	-	-	1.91247	3.26157e-07	-79.7926	1.4633	9.35015e-06	-37.9369	1.61032	4.65623e-07	-27.2747	1.62525	2.80658e-06	43.993	1.20252	6.07805e-05	-13.7441
875	75.47	680	C10H12N3O3PS2	3-(dimethoxyphosphinothioylsulfanylmethyl)-1,2,3-benzotriazin-4-one	Organo heterocyclic compounds	Benzo-1,2,3-triazines	Benzotriazine organothiophosphates	1.41388	1.60577e-05	-23.0185	-	-	-	1.20446	3.2068e-05	-17.2192	1.67543	9.56656e-07	-45.3462	1.3107	1.98757e-05	-23.2446	1.40251	1.13796e-06	-17.2192	1.42079	9.16452e-06	25.4067	1.08731	0.0001236	-8.75046
876	96.86	350.2	C13H28N4O4	@H](n2cnc3c(N)ncnc23)O1)O)O	Organic oxygen compounds	Organooxygen compounds	Carbohydrates and carbohydrate conjugates	-	-	-	-	-	-	-	-	-	1.17129	1.37409e-05	8.83935	1.13763	7.38089e-05	6.99866	1.10473	6.26675e-06	5.25341	1.02877	0.000679519	3.09343	-	-	-
878	91.45	618.4	C13H21N5O2	7-[2-(diethylamino)ethyl]-1,3-dimethylpurine-2,6-dione	Organo heterocyclic compounds	Imidazopyrimidines	Purines and purine derivatives	-	-	-	1.49715	4.12925e-06	18.5474	1.09691	2.22787e-06	19.8171	1.70065	1.13115e-07	37.5084	1.72407	1.0353e-06	32.7665	1.65887	9.22345e-08	19.8171	1.38355	6.19291e-06	14.0189	1.53797	2.26138e-06	19.0477
880	82.99	269.2	C11H21N5O4	Hydroxyprolyl-Arginine	Organic acids and derivatives	Amino acids and peptides	Dipeptides	1.47873	2.66981e-05	10.1365	1.87363	4.15035e-06	23.4148	1.6442	5.15365e-05	9.18116	1.60436	1.69625e-06	20.3233	1.77371	3.58e-06	25.6826	1.28322	1.74173e-06	9.18116	1.55587	1.08875e-05	14.5933	1.69983	1.15901e-05	14.5515
882	73.85	694						1.44187	1.33591e-05	-21.2907	1.01725	4.07348e-05	-5.70166	1.2808	2.01629e-05	-16.034	1.73341	4.96659e-07	-43.03	1.33553	1.19025e-05	-22.7374	1.42916	7.55999e-07	-16.034	1.53425	4.02526e-06	25.8027	1.13337	6.02254e-05	-10.3294
883	99.87	211	C9H11NO6	(E,5Z,7S)-7-amino-5-(hydroxymethylidene)-2-oxooct-3-enedioic acid	Organic acids and derivatives	Carboxylic acids and derivatives	Amino acids, peptides, and analogues	1.09875	3.72228e-05	-10.8109	-	-	-	1.0727	3.49966e-05	-13.8812	1.56479	1.32612e-06	-32.2296	1.45192	7.30623e-06	-29.7389	1.36352	1.21301e-06	-13.8812	1.30119	1.30176e-05	18.7753	1.18566	4.77307e-05	-11.9153
884	<70	123.9						1.27767	0.000136379	-5.10545	-	-	-	1.41939	0.00195009	-2.48438	-	-	-	-	-	-	-	-	-	-	-	-	-	-	-
885	99.8	193	C9H9NO5	(2S,4E)-4-(2-oxoethylidene)-1,2,3,4-tetrahydropyridine-2,6-dicarboxylic acid	Organic acids and derivatives	Carboxylic acids and derivatives	Amino acids, peptides, and analogues	1.23727	2.26372e-05	-12.382	-	-	-	-	-	-	1.07187	2.57403e-05	-8.63501	-	-	-	-	-	-	1.06286	7.19396e-05	8.03309	-	-	-
886	95.22	662.4	C33H60O14	[(2S)-2-hydroxy-3-[(2R,3R,4S,5R,6R)-3,4,5-trihydroxy-6-[[(2S,3R,4S,5R,6R)-3,4,5-trihydroxy-6-(hydroxymethyl)oxan-2-yl]oxymethyl]oxan-2-yl]oxypropyl] (Z)-octadec-9-enoate	Lipids and lipid-like molecules	Glycerolipids	Glycosylglycerols	-	-	-	1.16282	9.78477e-06	8.43238	1.0327	1.31178e-05	10.3314	1.43655	5.91042e-07	19.5774	1.44643	4.54874e-06	16.5545	1.42233	4.8816e-07	10.3314	1.20449	1.90807e-05	9.07427	1.20443	2.01038e-05	9.1859
887	70.65	520.21						1.35442	1.5826e-05	-17.2423	1.14559	2.55453e-05	-7.4683	-	-	-	1.77235	4.42588e-07	-41.9102	1.55468	3.62533e-06	-36.0459	1.57366	4.19149e-07	-18.9783	1.43786	5.56602e-06	22.7886	1.34283	2.32239e-05	-15.0418
888	73.62	664.46						1.56487	6.50878e-06	-30.0849	1.03485	3.41158e-05	-6.23286	1.41897	1.28288e-05	-18.225	1.74785	4.48279e-07	-42.9272	1.45635	7.01578e-06	-27.8669	1.52711	4.74209e-07	-18.225	1.56167	3.50658e-06	26.5686	1.21071	3.96637e-05	-11.9506
889	87.7	157.12						-	-	-	-	-	-	-	-	-	1.09114	4.23611e-05	-6.99551	-	-	-	1.0266	1.37079e-05	-4.53413	-	-	-	-	-	-
891	70.86	289.9	C8H5Cl3O3	2,3,5-trichloro-6-methoxybenzoic acid	Benzenoids	Benzene and substituted derivatives	Benzoic acids and derivatives	-	-	-	-	-	-	-	-	-	1.22302	1.8081e-05	-10.5429	1.1098	6.08047e-05	-9.92012	1.25758	3.03107e-06	-8.44366	-	-	-	-	-	-
893	87.62	165	C8H9NO4	2-amino-3-hydroxy-5-methoxy-benzoic acid	Benzenoids	Benzene and substituted derivatives	Benzoic acids and derivatives	1.01148	4.53606e-05	-7.17172	-	-	-	-	-	-	-	-	-	-	-	-	-	-	-	-	-	-	-	-	-
894	99.96	143.1	C8H17NO	(3S,6S)-6-propylpiperidin-3-ol	Organic nitrogen compounds	Alkaloids and derivatives	Citraconoyl	1.05217	0.000128198	3.71049	-	-	-	1.06565	0.00026321	4.55843	-	-	-	1.26288	4.42994e-05	7.71335	1.00325	7.65605e-06	4.55843	1.07246	0.000275785	4.05471	1.08456	0.000109161	5.24192
895	76.82	657.89						-	-	-	1.14404	1.57975e-05	10.4007	1.30902	8.34726e-06	21.1877	1.25458	5.59884e-06	17.8381	1.39595	1.0331e-05	22.4983	1.73353	3.20169e-07	21.1877	1.09102	5.20531e-05	10.4437	1.24785	2.68822e-05	13.9634
896	84.56	356.3	C21H40O4	1-(11E-octadecenoyl)-rac-glycerol	Lipids and lipid-like molecules	Glycerolipids	Monoacylglycerols	-	-	-	-	-	-	-	-	-	1.17001	9.42403e-06	11.2292	1.19101	7.1241e-05	7.64639	1.16395	3.8108e-06	6.74357	1.1935	0.000115407	6.22589	-	-	-
898	<70	264						1.40193	2.20487e-05	9.92527	1.72227	3.68802e-06	19.6793	1.61351	1.03349e-05	13.127	1.75691	3.07058e-07	28.561	1.67171	3.75567e-06	21.2676	1.53631	3.9171e-07	13.127	1.687	3.05435e-06	17.1632	1.63131	7.71667e-06	13.9892
899	76.03	725.9						1.34891	1.49858e-05	18.6265	1.55209	5.26116e-06	19.5711	1.92545	3.31086e-06	24.6011	1.44134	1.52298e-06	25.1604	1.56314	4.8626e-06	27.375	1.92103	1.34154e-07	24.6011	1.42102	9.86936e-06	17.6221	1.40755	1.4812e-05	15.8346
900	83.77	242.1	C8H10N2O5	4-[(2S)-2-amino-2-carboxy-ethyl]-5-methyl-isoxazole-3-carboxylic acid	Organic acids and derivatives	Carboxylic acids and derivatives	Amino acids, peptides, and analogues	1.20893	1.56826e-05	-13.1155	-	-	-	1.00678	0.000310452	-4.6933	-	-	-	-	-	-	-	-	-	1.13244	3.23811e-05	9.01103	-	-	-
901	76.23	199	C8H11NO6	2-(2-amino-2-carboxyethyl)-5-oxooxolane-2-carboxylic acid	Organic acids and derivatives	Carboxylic acids and derivatives	Amino acids, peptides, and analogues	1.42982	1.7782e-05	-14.1995	1.1586	2.62893e-05	-6.82243	1.40552	0.000274878	-5.58236	1.41173	3.31482e-06	-17.2041	1.23757	3.6576e-05	-11.4369	-	-	-	1.29684	1.95125e-05	12.655	-	-	-
902	99.9	156.2	C10H22O2	1,1-dimethoxyoctane	Organic oxygen compounds	Organooxygen compounds	Ethers	1.1235	3.52204e-05	-8.11131	-	-	-	-	-	-	0.999239	2.40704e-05	-7.57538	1.02341	4.19075e-05	-8.92293	-	-	-	1.08134	3.45873e-05	9.00148	1.00537	7.07392e-05	-6.7454
903	70.09	700						1.51633	4.36712e-06	-22.2091	-	-	-	1.17595	3.19106e-05	-9.44089	1.54853	8.46664e-07	-21.1875	1.20507	1.22694e-05	-14.283	1.22622	1.13395e-06	-9.44089	1.57736	1.68818e-06	19.3761	1.03754	6.18405e-05	-7.27562
904	<70	287						-	-	-	1.11813	2.12141e-05	6.86579	1.16974	6.87552e-05	8.04134	1.08687	1.81406e-05	8.74424	1.32319	1.98677e-05	12.779	1.28446	2.15181e-06	8.04134	1.00081	0.00011533	6.21119	1.19307	5.00517e-05	8.28693
905	74.67	512	C10H8O6S	(4-methyl-2-oxochromen-7-yl) hydrogen sulfate	Phenylpropanoids and polyketides	Coumarins and derivatives		1.18314	2.36766e-05	-12.2386	-	-	-	1.03408	0.000170827	-6.74019	1.22756	7.17509e-06	-14.0581	1.08374	7.84707e-05	-8.46086	1.05569	5.02768e-06	-6.74019	1.15761	3.54549e-05	10.4416	-	-	-
908	98.08	666.04						1.4558	8.04607e-06	-18.5682	-	-	-	1.30033	1.79176e-05	-11.4557	1.63604	4.7718e-07	-26.2	1.27678	9.46282e-06	-16.5317	1.32837	6.70007e-07	-11.4557	1.50267	2.41992e-06	19.2924	1.07072	5.60616e-05	-7.77076
909	78.68	515.95						1.50371	6.02657e-06	-23.7706	1.0331	2.67787e-05	-6.49766	1.24147	1.67921e-05	-13.4404	1.82877	2.92653e-07	-36.3639	1.50029	3.59124e-06	-28.1128	1.41145	6.27188e-07	-13.4404	1.64001	1.49972e-06	24.8185	1.34762	1.53988e-05	-13.9478
910	93.62	306.1	C14H12O3S	2-[4-[(thiophen-2-yl)carbonyl]phenyl]propanoic acid	Organic acids and derivatives	Cinnamic acids and derivatives		-	-	-	-	-	-	-	-	-	1.18839	6.77403e-06	-10.3934	-	-	-	1.03011	4.65007e-06	-5.41511	1.10205	4.22891e-05	7.53459	-	-	-
911	82.85	377.1	C20H15NO5	13-methyl-13,14-dihydro-2H,10H-[1,3]dioxolo[4,5-i][1,3]dioxolo[4',5':4,5]benzo[1,2-c]phenanthridin-5-ol	Organic nitrogen compounds	Alkaloids and derivatives	Benzophenanthridine alkaloids	1.00966	5.01108e-05	-6.08691	-	-	-	-	-	-	-	-	-	-	-	-	-	-	-	-	-	-	-	-	-
912	73.01	713						1.42988	9.20408e-06	-17.1743	-	-	-	1.16234	1.77656e-05	-11.3317	1.64583	4.32543e-07	-26.5335	1.24191	1.27012e-05	-14.4139	1.35571	6.65079e-07	-11.3317	1.54616	2.65686e-06	18.3125	-	-	-
913	98.06	608.2	C28H32O15	5-hydroxy-2-(4-methoxyphenyl)-3-[(2S,5S)-3,4,5-trihydroxy-6-(hydroxymethyl)oxan-2-yl]oxy-7-[(2S,4S,5R)-3,4,5-trihydroxy-6-methyloxan-2-yl]oxychromen-4-one	Phenylpropanoids and polyketides	Flavonoids	Flavonoid glycosides	1.11188	2.76687e-05	9.22366	1.14218	2.32226e-05	6.13854	1.28624	0.000196171	5.5027	0.998054	1.80108e-05	8.20401	-	-	-	1.04389	5.67394e-06	5.5027	1.3262	2.76671e-05	9.71484	1.03103	9.11023e-05	6.17288
914	93.91	442.3	C22H38O7	2-(3,4-dihydroxy-5-oxo-2,5-dihydrofuran-2-yl)-2-hydroxyethyl hexadecanoate	Lipids and lipid-like molecules	Fatty Acids and Conjugates	Wax diesters	-	-	-	-	-	-	-	-	-	1.25783	7.46884e-06	-18.1073	1.18952	5.34044e-05	-12.3688	1.27986	2.44788e-06	-10.781	-	-	-	-	-	-
915	98.5	422.2	C11H21N3O4	L-Alanyl-glycyl-L-leucine	Organic acids and derivatives	Carboxylic acids and derivatives	Amino acids, peptides, and analogues	-	-	-	-	-	-	-	-	-	1.06252	2.90328e-05	-10.0714	-	-	-	1.09792	9.98233e-06	-6.08436	-	-	-	-	-	-
918	98.53	608.2	C28H34O16	7-[4,5-dihydroxy-6-(hydroxymethyl)-3-[3,4,5-trihydroxy-6-(hydroxymethyl)oxan-2-yl]oxyoxan-2-yl]oxy-1,4,5-trimethoxyxanthen-9-one	Organo heterocyclic compounds	Benzopyrans	1-benzopyrans	1.20853	1.92002e-05	10.4258	1.0414	3.1473e-05	4.96151	1.28484	0.000189757	5.45081	1.00264	2.14097e-05	7.53508	-	-	-	1.0475	5.50282e-06	5.45081	1.24574	3.10862e-05	9.10043	-	-	-
919	91.81	624.2	C28H32O16	5,7-dihydroxy-2-(4-hydroxy-3-methoxyphenyl)-8-[(2S,4R,5S)-3,4,5-trihydroxy-6-[[(2R,4S,5S)-3,4,5-trihydroxy-6-(hydroxymethyl)oxan-2-yl]oxymethyl]oxan-2-yl]chromen-4-one	Phenylpropanoids and polyketides	Flavonoids	Flavones and Flavonols	1.26483	1.75416e-05	9.92337	-	-	-	1.08299	0.00156435	2.27047	-	-	-	-	-	-	-	-	-	-	-	-	-	-	-
920	<70	920						1.22593	1.58926e-05	-12.413	-	-	-	1.01046	1.8976e-05	-10.4043	1.58854	3.39667e-07	-25.6564	1.12083	2.58324e-05	-10.4461	1.3015	7.12719e-07	-10.4043	1.41738	3.70403e-06	15.5057	-	-	-
921	86.42	460.1	C23H26O11	[(2R,3S,4R,5R,6R)-6-[2-(3,4-dihydroxyphenyl)ethoxy]-4,5-dihydroxy-2-(hydroxymethyl)oxan-3-yl] (E)-3-(3,4-dihydroxyphenyl)prop-2-enoate	Phenylpropanoids and polyketides	Cinnamic acids and derivatives	Hydroxycinnamic acids and derivatives	-	-	-	-	-	-	-	-	-	1.0759	1.08653e-05	-9.3558	-	-	-	1.18508	2.09045e-06	-7.16584	-	-	-	-	-	-
922	86.9	225.06						1.22558	3.36441e-05	-7.77708	-	-	-	1.09833	0.000240735	-4.86622	-	-	-	-	-	-	1.0656	6.89314e-06	-4.86622	1.1346	8.23622e-05	6.13723	-	-	-
923	96.76	854.6	C22H39NO5	(Z)-7-[(1R,2R,3R,5S)-3,5-dihydroxy-2-[(E,3S)-3-hydroxyoct-1-enyl]cyclopentyl]-N-(2-hydroxyethyl)hept-5-enamide	Lipids and lipid-like molecules	Fatty Acids and Conjugates	Eicosanoids	-	-	-	1.06506	1.62794e-05	6.00411	1.03501	0.000100367	5.65548	1.16176	8.56013e-06	8.38605	1.31764	9.2942e-06	11.9472	1.08172	3.04419e-06	5.65548	1.06746	3.42203e-05	7.25961	1.31599	1.46348e-05	9.29306
924	87.12	192.1	C7H14O7	(2R,3R,4S,5R,6R)-2,3,4,5,6,7-hexahydroxyheptanal	Organic oxygen compounds	Organooxygen compounds	Carbohydrates and carbohydrate conjugates	-	-	-	-	-	-	-	-	-	1.12706	2.50095e-05	8.77768	1.3228	1.93459e-05	15.3872	-	-	-	1.02081	8.22702e-05	7.84512	1.15257	0.000101257	6.98681
925	82.84	236	C9H3O6-	6-hydroxy-1,3,5-trioxocyclohepta[c]furan-8-olate	Organo heterocyclic compounds	Hydrocarbon derivatives	Tropones	1.20326	2.88782e-05	-8.51288	-	-	-	1.00955	0.000141662	-5.81575	1.12562	1.0035e-05	-9.59745	-	-	-	1.09012	4.18089e-06	-5.81575	1.27137	3.31451e-05	8.43913	-	-	-
